# Supplementary material for: Is loneliness associated with increased health and social care utilisation in the oldest old? Findings from a population-based longitudinal study
Source: PubMed Central journal article supplement — BMJ Open. 2019 Jun 1;9(5):e024645. doi: 10.1136/bmjopen-2018-024645 (PMC6549652; doi:10.1136/bmjopen-2018-024645), 2019-06-01
Supplement: bmjopen-2018-024645.draft_revisions.pdf [file bmjopen-2018-024645.draft_revisions.pdf]

# BMJ Open

BMJ Open is committed to open peer review. As part of this commitment we make the peer review history of every article we publish publicly available.

When an article is published we post the peer reviewers' comments and the authors' responses online. We also post the versions of the paper that were used during peer review. These are the versions that the peer review comments apply to.

The versions of the paper that follow are the versions that were submitted during the peer review process. They are not the versions of record or the final published versions. They should not be cited or distributed as the published version of this manuscript.

BMJ Open is an open access journal and the full, final, typeset and author-corrected version of record of the manuscript is available on our site with no access controls, subscription charges or pay-per-view fees (<http://bmjopen.bmj.com>).

If you have any questions on BMJ Open's open peer review process please email [info.bmjopen@bmj.com](mailto:info.bmjopen@bmj.com)

# BMJ Open

## Is loneliness associated with increased health and social care utilisation in the oldest old? Findings from a population-based longitudinal study

|                               |                                                                                                                                                                                                                                                                                                                                                                                                                                                     |
|-------------------------------|-----------------------------------------------------------------------------------------------------------------------------------------------------------------------------------------------------------------------------------------------------------------------------------------------------------------------------------------------------------------------------------------------------------------------------------------------------|
| Journal:                      | <i>BMJ Open</i>                                                                                                                                                                                                                                                                                                                                                                                                                                     |
| Manuscript ID                 | bmjopen-2018-024645                                                                                                                                                                                                                                                                                                                                                                                                                                 |
| Article Type:                 | Research                                                                                                                                                                                                                                                                                                                                                                                                                                            |
| Date Submitted by the Author: | 11-Jun-2018                                                                                                                                                                                                                                                                                                                                                                                                                                         |
| Complete List of Authors:     | Wang, Hanyuying; Institute of Public Health, University of Cambridge<br>Zhao, Emily<br>Fleming, Jane; University of Cambridge, Cambridge Institute of Public Health; University of Cambridge, Department of Public Health and Primary Care<br>Denning, Tom; University of Nottingham,<br>Khaw, Kay-Tee; University of Cambridge, Department of Public Health and Primary Care<br>Brayne, Carol; University of Cambridge, Institute of Public Health |
| Keywords:                     | Loneliness, Health service, Social care, The oldest old                                                                                                                                                                                                                                                                                                                                                                                             |
|                               |                                                                                                                                                                                                                                                                                                                                                                                                                                                     |

SCHOLARONE™  
Manuscripts

1  
2  
3 **Is loneliness associated with increased health and social care utilisation in the oldest old?**  
4 **Findings from a population-based longitudinal study**  
5  
6  
7

8 Hanyuying Wang<sup>1</sup>, Emily Zhao<sup>1</sup>, Jane Fleming<sup>1</sup>, Tom Denning<sup>2</sup>, Kay-Tee Khaw<sup>3</sup>, Carol Brayne<sup>1,3</sup>,  
9 other CC75C collaborators  
10

- 11  
12 1. Institute of Public Health, University of Cambridge, Cambridge, UK  
13 2. Institute of Mental Health, University of Nottingham Innovation Park, Nottingham,  
14 UK  
15 3. Department of Public Health and Primary Care, Cambridge, UK  
16  
17  
18  
19  
20

21 Corresponding author  
22 Hanyuying Wang  
23 Institute of Public Health  
24 Forvie Site, Robinson Way  
25 Cambridge, CB2 0SR  
26 Email: [hw448@medschl.cam.ac.uk](mailto:hw448@medschl.cam.ac.uk)  
27  
28 Tel: 07843853914  
29  
30  
31  
32  
33

34 Word count: 3352  
35  
36  
37  
38  
39  
40  
41  
42  
43  
44  
45  
46  
47  
48  
49  
50  
51  
52  
53  
54  
55  
56  
57  
58  
59  
60

## Abstract

**Objectives** The present study aimed to examine the impact of loneliness on health and social care service use over a 7-year follow-up in the oldest old.

**Design** Prospective study.

**Setting** UK population-based cohort

**Participants** 713 people aged 80 years or older were interviewed at wave 3 of the Cambridge City over-75s Cohort Study (CC75C). Of these, 665 provided data on loneliness. During the follow-up, 480 participants left study, of which 389 due to death. 162 remained in study and answered lonely question.

**Main outcome measure** Use of health and social care services, which was assessed at each wave from wave 3 to wave 5

**Results** At wave 3, of 665 participants who had data on loneliness, about 60% did not feel lonely, 16% felt slightly lonely and additional 25% felt lonely. Being slightly lonely at wave 3 was associated with a shorter time since last seeing a GP ( $\beta=-2.7$ , 95%CI: -4.3, -1.0); When examining the association between time-varying loneliness and health and social care usage, being lonely was associated with three times more likely to have contact with community nurses and use meals on wheels services, respectively (community nurse contact: IRR=3.4, 95%CI: 1.4, 8.7; meals on wheels service use: IRR=2.5, 95%CI: 1.1, 5.6). No associations between loneliness and other health and social care services use were found.

**Conclusion** Loneliness was a significant risk factor for certain types of health and social care utilisations, independently of participants' health conditions, in the oldest old. Findings from current study have several implications, including the need for awareness-raising and prevention of loneliness to be priorities for public health policy and practice.

**Keywords** Loneliness, health service, social care, the oldest old

### Strengths and limitations of this study

- Study participants were from one of the longest-run prospective cohort studies of the very old; a wide range of important confounders were adjusted for.
- Loneliness and health and social care utilisation were measured repeatedly during follow-up, therefore, the more thorough association between time-varying loneliness and health and social care usage can be examined.
- Dropout and missing data were adjusted by using inverse probability weighting
- Findings from current study might not generalise to people living in the UK, because the CC75C recruited men and women living in Cambridge only.

## Introduction

Loneliness is an unpleasant feeling resulting from the mismatch between individuals' obtained social relationships and desired ones. It is commonly experienced by older people. Previous studies have reported that at any given time, about one quarter of individuals aged 65-79 reported feeling lonely, and the percentage feeling loneliness increased to about 40% among individuals aged 80 and over[1]. The evidence of adverse effects of loneliness on physical and mental health has been well documented, for example, loneliness was associated with sleep fragmentation, high blood pressure, cognitive function decline and onset of Alzheimer's disease[2-5]. Moreover, a systematic review reported that loneliness is a risk factor for mortality comparable to those well-known risk factors such as smoking, diabetes and physical inactivity[6].

Because of the strong relationships between loneliness and health outcomes, and the associations between adverse health and use of health and social services, there has been much interest in exploring the role of loneliness as an independent risk factor for health service and social care utilisation. However, findings from previous studies have been inconsistent. Using data from the Health and Retirement Study (HRS), researchers investigated whether loneliness was related to increased frequency of physician visits and hospital admission over a 4-year follow-up, and found that loneliness was significantly associated with physician visits but not hospital admission[7]. However, a longitudinal study following up Canadian community-dwelling elders for 2.5 years did not find any associations between loneliness and physician visits or hospitalization[8]. The heterogeneity in existing evidence is likely to be due to the differences in study sample, selection of covariates, length of follow-up time, and the measures of loneliness. On the other hand, most studies focused on the general older population (aged 65 and over) with the oldest old (aged 80 and over) under-represented. Compared to the young old, the oldest old are at greater risk of losing family members and friends, experiencing physical or mental health decline, and therefore, are more vulnerable to changes in both loneliness and health, consequently, their demand for health and social care services is greater. Moreover, to the best of our knowledge, only one longitudinal study examined the impact of loneliness on health and social care service use by using repeated assessments (loneliness was measured at two time points in that study) over time[7]. However, with only two measures, researchers were not able to capture the fluctuating nature of loneliness[9-11], therefore, the complicated association between time-varying loneliness and health and social care utilisation could not be examined.

The current study aims to address two main questions. First, whether loneliness at baseline is associated with health and social care service use, and second, when loneliness was assessed at different times, whether there are relationships between time-varying loneliness and health and social care service use.

## Method

### Study sample

Participants were from wave 3 to wave 5 of the Cambridge City over-75s Cohort Study (CC75C), a population-based prospective cohort study of individuals aged 75 or older. The detailed description of this study can be found elsewhere[12]. Briefly, in 1985, 2610 men and women aged 75 and over from geographically and socially representative general practices in Cambridge were recruited with a high response rate (95% in six of the seven general practices), of whom 2166 were at the initial wave of this study (444 were excluded due to different recruitment or participation in a concurrent intervention study). This group of individuals was then surveyed by trained lay interviewers using a similar questionnaire every 3 or 4 years, and in total, 10 waves of data have been collected. Written informed consent was obtained from all participants (or from their proxy informants for those who were frail). This study was approved before each survey wave by Cambridge Research Ethics Committee. Figure 1 describes the overview of participation for current analysis.

### Measures

#### Health and social care utilisation

The health and social care utilisation included in this study consisted of community service contacts, hospital visits and general practice (GP) visits. The community service contact comprised the number of self-reported contacts with a home help, community nurse, meals on wheels or day centre in the past week. For each service more than six contacts a week were coded as six. Hospital visits was assessed by asking participants how many times they had been in hospital in the past year, coded 0, 1 or 2 with this maximum score reflecting two or more, due to the small frequency of more frequent visits. As an indicator of frequency of GP visits participants were asked how long it had been since they last saw a GP; answers were recorded in months up to a maximum of 98. In analyses, community service contact and hospital visit responses were treated as count variables, and time since last GP visit was treated as a continuous variable.

#### Loneliness

At each wave, loneliness was assessed by a single question 'Do you feel lonely?', with response options 'not at all lonely', 'slightly lonely', 'lonely', and 'very lonely'. In analyses, due to the small number of participants who reported feeling lonely or very lonely, these two categories were then combined as one category: 'lonely'. Therefore, loneliness was divided into three levels here: 'not lonely' (indicates 'not at all lonely'), 'slightly lonely' and 'lonely' (indicates 'lonely' and 'very lonely'). The single-item scale was used widely in European studies, and it has been reported that it was adopted well by the older population[13].

## Covariates

The covariates included in analyses were demographics and variables associated with loneliness and health outcomes. They were age (80-84, 85-89, and 90+), sex (men as the reference), physical impairments (measured through a series of self-reported or proxy-reported conditions, including poor vision, poor hearing, arthritis/rheumatism, back pain, chest pain, shortness of breath, marked weakness in arms or leg, unsteady on feet, tendency to fall, trouble with nerves and others; the total score was the sum of score for each condition and categorised into low, moderate and severe levels based on 25%, 50% and 75% percentiles), number of chronic diseases (included self-reported doctor-diagnosed angina, heart attack, circulation problems in legs, high blood pressure, chronic bronchitis, stroke, sudden weakness or difficulty with speech, memory or vision, sugar diabetes, thyroid problems, severe headaches or migraine and others; categorised into 0-2 or  $\geq 3$  conditions), depression (measured by a series of questions derived from the Cambridge Examination for Mental Disorders in the Elderly (CAMDEX)[14], the total score ranged from 0-10, and depression was defined if score  $\geq 6$ ), physical functioning (assessed by participants' responses to questions on activities of daily living (ADL), and categorised into no disability, instrumental ADL (IADL) disability only or disability in both basic ADLs & IADLs)[15], and cognition (assessed by Mini-Mental Status Examination (MMSE), score ranged from 0-30). All covariates were measured at wave 3.

## Statistical analysis

The current analyses included participants who had provided data on loneliness at wave 3. Loneliness non-response at wave 3 was adjusted by inverse probability weighting. The calculation was modelled on variables associated with loneliness missingness. The characteristics of the sample were described according to their wave 3 loneliness level after adjusting for non-response. A typology of changing patterns of loneliness was adapted from previous studies[9-10] to explore the prevalence of loneliness at different time points, which consisted of "consistently non-lonely (remained non-lonely in all three waves)", "consistently lonely (remained slightly lonely or lonely in all three waves)", "increased loneliness (became lonelier at later waves than at previous wave, including different combinations, such as non-lonely at wave 3, slightly lonely at wave 4, and lonely at wave 5; or slightly lonely at wave 3, lonely at wave 4 and 5)", "decreased loneliness (became less lonelier at later waves than at previous wave, also including different combinations, e.g. lonely at wave 3, slightly lonely at wave 4, and non-lonely at wave 5; or lonely at wave 3 and 4, slightly lonely at wave 5)" and "fluctuated loneliness (the degree of loneliness at three waves was different and non-linear, e.g. non-lonely at wave 3, lonely at wave 4 and became non-lonely at wave 5)".

To examine the association between loneliness and health and social care utilisation over a 7-year follow-up, Generalized Estimating Equations (GEE) with independent variance matrix and negative binomial family were fitted to model count outcomes, and GEE with independent variance matrix with Gaussian family was used to model the continuous outcome. The use of GEE with independent variance matrix is expected to ensure the target for inference is based on the mortal cohort (living population at each wave)[16-17]. The use of negative binomial modelling for count responses can help with overdispersion control in

1  
2  
3 the data[18]. Two types of associations were tested. First, the association between baseline  
4 loneliness (measured at wave 3) and health and social care usage (repeated measurements  
5 at waves 3, 4, 5) was explored, and then the association between loneliness as a time-  
6 varying predictor (measured at wave 3, 4, 5) and health and social care usage was  
7 investigated (again, repeated measurements at wave 3, 4, 5) (Figure 2). In both analyses,  
8 time was entered (i.e. t=1, 2, 3) to reflect the order of the three repeated measurements.  
9

10  
11 To adjust for dropout during follow-up, the inverse probability weighting was calculated  
12 based on probability of staying in the study on the condition of responding to the previous  
13 wave and being alive at the current wave[16,19-21]. As participants in this study were  
14 followed up from wave 3 onwards, cross-sectional weight adjusting for dropout before wave  
15 3 was calculated. Taken together, a final weight was calculated by multiplying wave 3 cross-  
16 sectional weight, weight adjusting for loneliness non-response at wave 3 and longitudinal  
17 weight, and implemented in longitudinal analyses. All analyses were implemented in Stata  
18 v13.1 (StataCorp LP, College Station, TX, USA). A p-value <0.05 was considered statistically  
19 significant.  
20  
21

## 22 **Results**

23  
24 At wave 3, n=393 participants reported they were not lonely and, of those reporting any  
25 degree of loneliness, n=107 and n=165 said they felt “slightly lonely” and “lonely”,  
26 respectively. For 48/713 (7%) participants with no valid response to the loneliness question  
27 at wave 3, n=35 were proxy informant interviews. Participants who reported feeling lonely  
28 were more likely to be women, have a moderate to high level of physical impairment, be  
29 depressed and have disabilities in IADL & ADL compared to non-lonely individuals. The  
30 characteristics of individuals who reported feeling slightly lonely were similar to those who  
31 reported feeling lonely (Table 1).  
32  
33  
34  
35  
36  
37  
38  
39  
40  
41  
42  
43  
44  
45  
46  
47  
48  
49  
50  
51  
52  
53  
54  
55  
56  
57  
58  
59  
60



Table 1. The distribution of baseline characteristics by loneliness level (weight\* applied)

|                                   | Not lonely | Slightly lonely | Lonely | p-value |
|-----------------------------------|------------|-----------------|--------|---------|
|                                   | 59%        | 16%             | 25%    |         |
| <b>Age</b>                        |            |                 |        | 0.26    |
| 80-84                             | 44%        | 40%             | 34%    |         |
| 85-89                             | 38%        | 45%             | 44%    |         |
| 90+                               | 18%        | 15%             | 22%    |         |
| <b>Sex</b>                        |            |                 |        | <.001   |
| Men                               | 36%        | 23%             | 20%    |         |
| Women                             | 64%        | 77%             | 80%    |         |
| <b>Physical impairment</b>        |            |                 |        | <.001   |
| Low                               | 45%        | 28%             | 18%    |         |
| Moderate                          | 43%        | 43%             | 49%    |         |
| High                              | 12%        | 29%             | 33%    |         |
| <b>Number of chronic diseases</b> |            |                 |        | 0.13    |
| 0-2                               | 67%        | 65%             | 57%    |         |
| ≥ 3                               | 33%        | 35%             | 43%    |         |
| <b>Depression</b>                 |            |                 |        | <.001   |
| No                                | 95%        | 81%             | 73%    |         |
| Yes                               | 5%         | 19%             | 27%    |         |
| <b>Physical functioning</b>       |            |                 |        | <.05    |
| No disability                     | 34%        | 40%             | 33%    |         |
| IADL disability only              | 30%        | 20%             | 19%    |         |
| IADL & ADL disabilities           | 36%        | 40%             | 48%    |         |
| <b>Cognition (mean(sd))</b>       |            |                 |        | 0.7     |
| MMSE                              | 22 (6)     | 22 (6)          | 21 (7) |         |

Note: \* weight: the product of wave 3 cross-sectional weight and weight adjusted for non-response at wave 3; IADL: Instrumental Activities of Daily Living; ADL: Activities of Daily Living; MMSE: Mini Mental State Examination.

In terms of associations between baseline loneliness and health and social care utilisation, the only significant association was that feeling slightly lonely was positively associated with GP visits after adjusting for demographic characteristics and health problems (Table 2). Neither feeling lonely nor feeling slightly lonely were found to be related to home help use, community nurse contacts, meals on wheels service use, day centre or hospital visits. Results also indicated that moderate and high levels of physical impairment were significantly associated with home help use and with hospital visits. Having three or more chronic diseases was associated with community nurse contacts. Having disabilities in both IADL & ADL was related to increased frequency of day centre visits. On the other hand, depression was significantly and negatively associated with day centre visits. Being female and having at least three chronic diseases was associated with GP visits.

Table 2. Associations between baseline loneliness and health and social care utilisation

|                             | Home Help<br>IRR (95% CI) | Community Nurse<br>IRR (95% CI) | Meals on Wheels<br>IRR (95% CI) | Day centre<br>IRR (95% CI) | Hospital visits<br>IRR (95% CI) | Time since last saw a GP<br>Beta (95% CI) |
|-----------------------------|---------------------------|---------------------------------|---------------------------------|----------------------------|---------------------------------|-------------------------------------------|
| Time                        | 1.1 (0.4-2.8)             | 2.5 (0.9-6.9)                   | 1.1 (0.4-2.8)                   | 0.9 (0.3-2.6)              | 1.5 (0.7-3.0)                   | 0.4 (-2.5,3.2)                            |
| <b>Loneliness (wave 3)</b>  |                           |                                 |                                 |                            |                                 |                                           |
| Slightly lonely             | 1.3 (0.5-3.6)             | 0.6 (0.2-2.2)                   | 1.9 (0.8-4.9)                   | 1.6 (0.5-5.0)              | 1.3 (0.8-2.1)                   | <b>-2.7 (-4.3, -1.0)</b>                  |
| Lonely                      | 2.4 (0.8-7.3)             | 1.1 (0.5-2.5)                   | 2.0 (0.9-4.5)                   | 1.4 (0.3-5.3)              | 1.2 (0.8-1.9)                   | -0.8 (-2.7, 1.1)                          |
| <b>Age</b>                  |                           |                                 |                                 |                            |                                 |                                           |
| 85-89                       | 0.5 (0.2-1.1)             | 0.8 (0.4-1.9)                   | 0.8 (0.4-1.7)                   | 1.0 (0.4-2.3)              | 0.7 (0.5-1.1)                   | 1.1 (-0.8, 3.1)                           |
| 90+                         | 0.9 (0.2-3.9)             | 0.9 (0.3-2.6)                   | 0.6 (0.1-3.6)                   | 1.6 (0.1-19.9)             | 1.3 (0.6-2.9)                   | 1.2 (-4.2, 6.5)                           |
| <b>Sex</b>                  |                           |                                 |                                 |                            |                                 |                                           |
| Women                       | 1.3 (0.5-3.2)             | 0.7 (0.3-2.0)                   | 0.8 (0.4-2.0)                   | 1.4 (0.6-3.4)              | 0.7 (0.4-1.1)                   | <b>-2.5 (-5.2, 0.08)</b>                  |
| <b>Physical impairments</b> |                           |                                 |                                 |                            |                                 |                                           |
| Moderate                    | <b>2.3 (0.96-5.4)</b>     | 2.2 (0.9-5.1)                   | 0.6 (0.2-1.5)                   | 1.6 (0.4-5.8)              | 1.3 (0.8-2.1)                   | -0.4 (-2.7, 1.9)                          |
| High                        | <b>3.9 (1.5-10.6)</b>     | 2.0 (0.8-5.1)                   | 1.9 (0.8-4.6)                   | 3.2 (0.7-13.6)             | <b>2.5 (1.4-4.6)</b>            | -1.3 (-3.6, 1.0)                          |
| <b>Health condition</b>     |                           |                                 |                                 |                            |                                 |                                           |
| ≥ 3                         | 1.5 (0.7-3.3)             | <b>2.4 (1.1-5.0)</b>            | 1.2 (0.6-2.5)                   | 2.1 (0.7-6.5)              | 1.1 (0.7-1.7)                   | <b>-2.0 (-3.6, -0.5)</b>                  |
| <b>Depression</b>           |                           |                                 |                                 |                            |                                 |                                           |
| Yes                         | 0.6 (0.2-1.6)             | 0.6 (0.2-1.9)                   | 0.5 (0.2-1.5)                   | <b>0.3 (0.1-1.0)</b>       | 1.1 (0.5-2.2)                   | -1.0 (-2.6, 0.6)                          |
| <b>Physical functioning</b> |                           |                                 |                                 |                            |                                 |                                           |
| IADL disability only        | 2.4 (0.9-6.4)             | 1.0 (0.3-3.2)                   | 0.8 (0.3-2.6)                   | 2.4 (0.9-6.3)              | 0.7 (0.4-1.2)                   | -1.9 (-4.8, 0.9)                          |
| IADL & ADL disabilities     | 2.3 (0.9-6.2)             | 1.6 (0.6-3.9)                   | 1.5 (0.6-3.7)                   | <b>2.9 (0.96-8.9)</b>      | 1.0 (0.6-1.7)                   | 0.1 (-2.1, 2.3)                           |
| <b>Cognition</b>            | 0.9 (0.8-1.1)             | 1.0 (0.9-1.1)                   | 0.9 (0.8-1.1)                   | 1.0 (0.8-1.1)              | 1.0 (0.9-1.1)                   | -0.4 (-1.1, 0.3)                          |

Reference groups: not lonely, 80-84 years old, men, no physical impairments, 0-2 chronic diseases, not depressed, and not disabled.

IRR: incidence rate ratio.

During the 7-year follow-up, n=480/713 (67%) participants dropped out from study, and n=389 out of 480 (81%) dropped out due to mortality (Figure 1). Table 3 shows the changing patterns of loneliness for individuals who remained in the study and reported loneliness data over time. 37% participants did not feel lonely at three waves. For those who experienced loneliness, most had increased loneliness. 18% experienced decreased loneliness, and additional 12% had fluctuated loneliness.

Table 3 The trends of loneliness changes over 7-year follow-up (%)

| <b>Patterns of changes</b> | <b>Total</b> |
|----------------------------|--------------|
| Consistently non-lonely    | 37%          |
| Consistently lonely        | 8%           |
| Increased loneliness       | 25%          |
| Decreased loneliness       | 18%          |
| Fluctuated loneliness      | 12%          |

Table 4 presents the results of time-varying loneliness for health and social care usage. Individuals who felt lonely were three times more likely to contact the community nurse and use the meals on wheels service than non-lonely individuals, respectively. The other variables that were significantly associated with health and social care utilisation were similar to those in the analyses exploring the association between baseline loneliness and health and social care usage, except that the significance of the associations between depression, disabilities in IADL & ADL and day centre visits disappeared; instead, the high level of physical impairment was found to be significantly related to day centre visits.

Table 4. Association between time-varying loneliness and health and social care utilisation

|                             | Home Help<br>IRR (95% CI) | Community Nurse<br>IRR (95% CI) | Meals on Wheels<br>IRR (95% CI) | Day centre<br>IRR (95% CI) | Hospital visits<br>IRR (95% CI) | Time since last saw a GP<br>Beta (95% CI) |
|-----------------------------|---------------------------|---------------------------------|---------------------------------|----------------------------|---------------------------------|-------------------------------------------|
| Time                        | 1.0 (0.4, 2.5)            | 2.3 (0.9, 5.8)                  | 1.0 (0.4, 2.6)                  | 1.4 (0.4, 4.9)             | 1.3 (0.7, 2.6)                  | 0.1 (-2.5, 2.6)                           |
| <b>Loneliness</b>           |                           |                                 |                                 |                            |                                 |                                           |
| Slightly lonely             | 1.2 (0.5, 2.9)            | 0.8 (0.3, 2.6)                  | 1.6 (0.6, 3.8)                  | 1.7 (0.5, 5.5)             | 1.4 (0.9, 2.1)                  | -1.8 (-3.9, 0.3)                          |
| Lonely                      | 2.0 (0.8, 4.9)            | <b>3.4 (1.4, 8.7)</b>           | <b>2.5 (1.1, 5.6)</b>           | 1.4 (0.4, 5.3)             | 1.5 (0.9, 2.4)                  | -1.2 (-2.9, 0.5)                          |
| <b>Age</b>                  |                           |                                 |                                 |                            |                                 |                                           |
| 85-89                       | 0.5 (0.2, 1.1)            | 0.8 (0.3, 1.9)                  | 1.0 (0.5, 2.0)                  | 1.0 (0.4, 2.5)             | 0.7 (0.5, 1.2)                  | 1.0 (-0.9, 2.9)                           |
| 90+                         | 0.9 (0.2, 4.4)            | 1.3 (0.4, 4.7)                  | 0.6 (0.1, 5.9)                  | 4.2 (0.3, 51.7)            | 1.0 (0.4, 2.7)                  | 2.5 (-3.2, 8.1)                           |
| <b>Sex</b>                  |                           |                                 |                                 |                            |                                 |                                           |
| Women                       | 1.2 (0.5, 3.1)            | 0.5 (0.2, 1.5)                  | 0.8 (0.3, 1.9)                  | 1.4 (0.5, 4.0)             | <b>0.6 (0.4, 1.002)</b>         | <b>-2.5 (-5.1, 0.03)</b>                  |
| <b>Physical impairments</b> |                           |                                 |                                 |                            |                                 |                                           |
| Moderate                    | 2.3 (0.9, 5.7)            | 1.9 (0.8, 4.5)                  | 0.7 (0.2, 2.0)                  | 4.0 (0.7, 23.4)            | 1.3 (0.8, 2.1)                  | -0.3 (-2.4, 1.8)                          |
| High                        | <b>4.1 (1.6, 10.8)</b>    | 1.4 (0.4, 4.5)                  | 1.9 (0.7, 5.3)                  | <b>7.6 (1.2, 48.7)</b>     | <b>2.3 (1.2, 4.4)</b>           | -1.3 (-3.4, 0.8)                          |
| <b>Health condition</b>     |                           |                                 |                                 |                            |                                 |                                           |
| ≥3                          | 1.5 (0.7, 3.3)            | <b>2.6 (1.2, 5.5)</b>           | 1.2 (0.6, 2.6)                  | 2.3 (0.6, 8.7)             | 1.2 (0.8, 1.9)                  | <b>-2.0 (-3.6, -0.5)</b>                  |
| <b>Depression</b>           |                           |                                 |                                 |                            |                                 |                                           |
| Yes                         | 0.6 (0.2, 1.6)            | 0.5 (0.2, 1.5)                  | 0.5 (0.2, 1.7)                  | 0.3 (0.1, 1.1)             | 1.1 (0.5, 2.1)                  | -1.0 (-2.6, 0.6)                          |
| <b>Physical functioning</b> |                           |                                 |                                 |                            |                                 |                                           |
| IADL disability only        | 2.1 (0.8, 5.6)            | 0.9 (0.3, 2.7)                  | 0.8 (0.2, 2.6)                  | 2.7 (0.9, 8.5)             | 0.7 (0.4, 1.3)                  | -2.4 (-5.0, 0.3)                          |
| IADL & ADL disabilities     | 2.3 (0.8, 6.3)            | 1.0 (0.4, 2.5)                  | 1.5 (0.5, 4.5)                  | 2.1 (0.7, 6.7)             | 1.0 (0.6, 1.7)                  | 0.5 (-1.5, 2.5)                           |
| <b>Cognition</b>            | 0.9 (0.8, 1.0)            | 0.9 (0.8, 1.0)                  | 0.9 (0.8, 1.1)                  | 1.1 (0.9, 1.2)             | 1.0 (0.9, 1.1)                  | -0.4 (-1.1, 0.2)                          |

Reference groups: not lonely, 80-84 years old, men, no physical impairments, 0-2 chronic diseases, not depressed, and not disabled.

IRR: incidence rate ratio.

## Discussion

Results from this study indicate that loneliness is a significant risk factor for certain types of health and social care services among the oldest old regardless of health problems. In particular, feeling slightly lonely at baseline was associated with a shorter time since last GP visiting; when modelling the association between repeated measures of loneliness and health and social care usage, feeling lonely was found to be significantly associated with increased contacts with the community nurse and use of a meals on wheels service.

The finding of loneliness and its association with GP visits is consistent with the finding from a previous UK population-based study, though there are slight differences between the two studies. In our study, compared to non-lonely individuals, we found that those who felt slightly lonely had a shorter time interval since they last visited their GP; in their study, they found that individuals who felt lonely tended to visit GPs about twice as often as individuals who were not lonely[22]. The explanations for the link between loneliness and frequent GP visits might include that GPs are the first point of call for multiple care needs, and more importantly, the GP healthcare system is intended to allow GPs to build a long-term relationship with their patients. GPs therefore may be familiar with their patients' health conditions and even emotional changes, and consequently trust can be built within this relationship. Indeed, Ellaway and colleagues explained that older people who felt lonely and did not have family members or friends around them tended to regard their GPs as their confidants[22]. Similarly, data from the 'Campaign to End Loneliness' suggest that more than 75% of GPs and one in ten hospital doctors reported seeing about 1 to 5 or 1 to 6 lonely people in a day[23]. These findings imply that numerous lonely individuals are aware of their loneliness and have self-motivations to alleviate loneliness. Seeking advice from trusted GPs may give them a sense of hope and safety. Findings also highlight the importance of emotional support (e.g. having confidants) in the experience of loneliness.

To the best of our knowledge, this is the first time the associations between loneliness and community nurse contacts and use of a meals on wheels service have been studied. Although potentially indicating that these types of service use are markers for levels of poor health and disability associated with greater loneliness, the associations remained after controlling for numbers of health conditions. The independent significance of these associations could imply that similar with GPs, community nurses or meals on wheels service providers may have a hidden role in providing social interactions. For example, in a fixed randomized control study investigating the role of home-delivered meals programme on 626 American community-dwelling seniors' feelings of loneliness, researchers reported that compared to control groups (i.e. individuals who received meal delivery once a week and individuals remained on meal delivery waiting list), those who received their meals delivery on a daily basis experienced decreases in their loneliness, and the reduction was explained as the meal-delivery services indirectly provided more opportunities to elders for social interactions[24].

This study has several strengths. The use of data from one of the longest-run prospective cohort studies of the very old allows us to measure loneliness and outcome variables at different time points; by using the repeated measurements, we can therefore examine the association between loneliness and health and social care utilisation more thoroughly.

1  
2  
3 Moreover, CC75C collected data on different types of health and social care services, which  
4 enables us to investigate the impact of loneliness on health and social care utilisation in a  
5 broader way than previous studies did. Furthermore, the use of weights can minimise the  
6 effect of non-response to the findings and reduce bias due to drop out[17].  
7

8  
9 However, caution should be taken when interpreting the findings. The use of self-reported  
10 health service and social care utilisation may introduce recall bias. However, it is unlikely to  
11 have effects on our findings as for most interviewed participants, their proxy informants  
12 were also interviewed, and answers from both were compared and the most reliable  
13 answers (i.e. if answers were different, then proxy informants' answers were selected for  
14 participants who had cognitive problems) to minimize the differences. Additionally, the use  
15 of a single-item scale to assess loneliness may under-estimate the true prevalence of  
16 loneliness as participants might be concerned about social stigma, but it has been reported  
17 that single-item scales have advantages in implementation in large studies and have good  
18 reliability among older people[13]. Another consideration is that, as in previous studies[7],  
19 we included disability as one of the covariates, and it was determined by whether  
20 participants needed help from family, friends or neighbours for performing at least one of  
21 their daily activities, such as cooking or doing housework. This type of help can be regarded  
22 as informal care, therefore it is possible that participants who can obtain informal care may  
23 use fewer community services. Although this might dilute the association between  
24 loneliness and health care utilisation, it was unlikely to change the direction of the  
25 association.  
26  
27  
28

29 This finding has implications for public health and practice. As noted earlier, lonely  
30 individuals visit their GPs more frequently than non-lonely individuals. They expect  
31 emotional supports and professional advice from their GPs to alleviate feelings of loneliness.  
32 However, from GPs' point of view, they are burdened with lack of therapeutic options. This  
33 might be due to the fact that feeling lonely reflects individuals' personal experience,  
34 therefore, the trigger for loneliness varies between individuals. Moreover, the coping skills  
35 differ from individuals. In addition, GPs need to deal with time issues, e.g. lack of time.  
36 Taken together, the limited options to support people affected with loneliness and lack of  
37 time make it difficult for GPs to help with lonely patients[25]. This raises an urgent need for  
38 developing professional service that specifically target on loneliness, so that GPs can refer  
39 their lonely patients to appropriate help. Indeed, in a recent programme 'The town with a  
40 plan to end loneliness' aired by the BBC, a programme presenter pointed out that the  
41 medical centre not only is responsible for giving medical advice, but also should listen to  
42 patients' non-medical needs and connect them to people who can help[26].  
43  
44  
45

46 In addition, the finding that loneliness was associated with increased use of community  
47 services, such as frequent nurse contacts and meals on wheels service usage, has  
48 implications on public policy. This implication may be more pronounced for public officials in  
49 developing countries. For example, China is also facing quickened population ageing.  
50 However, the traditional social welfare system cannot meet the care needs resulting from  
51 the rapidly increased number of older people. The government has just recognized the  
52 importance of community services and is prioritising fostering the development of  
53 community services[27]. Interestingly, in spite of the differences in social and cultural  
54 contexts, the specific services that the Chinese government focuses on are day care, dining  
55  
56  
57  
58  
59

1  
2  
3 rooms or other centralized meal delivery services, echoing the community services in  
4 western countries[28]. Although the public official has been long aware that chronic  
5 diseases, such as physical and cognitive impairments, are strong predictors for community  
6 care services, loneliness as a risk factor has been neglected. Findings from the current study  
7 add new evidence, that is, loneliness also contributes to the great needs for community care  
8 services to public.  
9

10  
11 In conclusion, loneliness was found to be associated with frequent GP visits, community  
12 nurse contacts and meals on wheels service usage, independently of participants' health  
13 problems. As population ageing is happening across the world, it is urgent to realize the  
14 significance of loneliness on health service and social care demands. Moreover, evidence on  
15 interventions to prevent and reduce loneliness do not show promising results[29]. Future  
16 research is required to examine risk factors for loneliness in order to develop effective  
17 interventions that target on loneliness alleviation.  
18  
19  
20  
21  
22  
23  
24  
25  
26  
27  
28  
29  
30  
31  
32  
33  
34  
35  
36  
37  
38  
39  
40  
41  
42  
43  
44  
45  
46  
47  
48  
49  
50  
51  
52  
53  
54  
55  
56  
57  
58  
59  
60

## References

1. Dykstra PA. Older adult loneliness: myths and realities. *European journal of ageing* 2009;6(2):91.
2. Kurina LM, Knutson KL, Hawkley LC, et al. Loneliness is associated with sleep fragmentation in a communal society. *Sleep* 2011;34(11):1519-26.
3. Hawkley LC, Thisted RA, Masi CM, et al. Loneliness predicts increased blood pressure: 5-year cross-lagged analyses in middle-aged and older adults. *Psychology and aging* 2010;25(1):132.
4. O'lunaigh C, O'connell H, Chin A-V, et al. Loneliness and cognition in older people: the Dublin Healthy Ageing study. *Ageing & mental health* 2012;16(3):347-52.
5. Wilson RS, Krueger KR, Arnold SE, et al. Loneliness and risk of Alzheimer disease. *Archives of general psychiatry* 2007;64(2):234-40.
6. Holt-Lunstad J, Smith TB, Baker M, et al. Loneliness and social isolation as risk factors for mortality: a meta-analytic review. *Perspectives on Psychological Science* 2015;10(2):227-37.
7. Gerst-Emerson K, Jayawardhana J. Loneliness as a Public Health Issue: The Impact of Loneliness on Health Care Utilization Among Older Adults. *American Journal of Public Health* 2015;105(5):1013-19. doi: 10.2105/AJPH.2014.302427
8. Newall N, McArthur J, Menec VH. A longitudinal examination of social participation, loneliness, and use of physician and hospital services. *Journal of aging and health* 2015;27(3):500-18.
9. Wenger GC, Burholt V. Changes in levels of social isolation and loneliness among older people in a rural area: A twenty-year longitudinal study. *Canadian Journal on Aging/la revue canadienne du vieillissement* 2004;23(2):115-27.
10. Victor CR, Bowling A. A longitudinal analysis of loneliness among older people in Great Britain. *The Journal of psychology* 2012;146(3):313-31.
11. Brittain K, Kingston A, Davies K, et al. An investigation into the patterns of loneliness and loss in the oldest old—Newcastle 85+ study. *Ageing & Society* 2017;37(1):39-62.
12. Fleming J, Zhao E, O'connor DW, et al. Cohort profile: the Cambridge City over-75s Cohort (CC75C). *International journal of epidemiology* 2007;36(1):40-46.
13. Victor C, Grenade L, Boldy D. Measuring loneliness in later life: a comparison of differing measures. *Reviews in Clinical Gerontology* 2005;15(1):63-70.
14. Roth M, Tym E, Mountjoy C, et al. CAMDEX. A standardised instrument for the diagnosis of mental disorder in the elderly with special reference to the early detection of dementia. *The British journal of psychiatry* 1986;149(6):698-709.
15. Lawton MP, Brody EM. Assessment of older people: self-maintaining and instrumental activities of daily living. *The gerontologist* 1969;9(3\_Part\_1):179-86.
16. Kurland BF, Heagerty PJ. Directly parameterized regression conditioning on being alive: analysis of longitudinal data truncated by deaths. *Biostatistics* 2005;6(2):241-58.
17. Jones M, Mishra GD, Dobson A. Analytical results in longitudinal studies depended on target of inference and assumed mechanism of attrition. *J Clin Epidemiol* 2015;68(10):1165-75. doi: 10.1016/j.jclinepi.2015.03.011 [published Online First: 2015/04/30]
18. Karazsia BT, Van Dulmen MH. Regression models for count data: Illustrations using longitudinal predictors of childhood injury. *Journal of pediatric psychology* 2008;33(10):1076-84.



19. Robins JM, Rotnitzky A, Zhao LP. Analysis of semiparametric regression models for repeated outcomes in the presence of missing data. *Journal of the American statistical association* 1995;90(429):106-21.
20. Dufouil C, Brayne C, Clayton D. Analysis of longitudinal studies with death and drop-out: a case study. *Statistics in medicine* 2004;23(14):2215-26.
21. Kurland BF, Johnson LL, Egleston BL, et al. Longitudinal Data with Follow-up Truncated by Death: Match the Analysis Method to Research Aims. *Statistical science : a review journal of the Institute of Mathematical Statistics* 2009;24(2):211. doi: 10.1214/09-STS293
22. Ellaway A, Wood S, Macintyre S. Someone to talk to? The role of loneliness as a factor in the frequency of GP consultations. *Br J Gen Pract* 1999;49(442):363-67.
23. Cooper, C. The Campaign to End Loneliness Surveyed more than 1,000 family doctors. *Independent* 2013 Nov; <https://www.independent.co.uk/life-style/health-and-families/health-news/charity-claims-loneliness-is-the-reason-one-in-10-visit-their-gp-8940392.html> (accessed 5 May 2018).
24. Thomas KS, Akobundu U, Dosa D. More than a meal? A randomized control trial comparing the effects of home-delivered meals programs on participants' feelings of loneliness. *Journals of Gerontology Series B: Psychological Sciences and Social Sciences* 2015;71(6):1049-58.
25. van der Zwet J, Koelewijn-van Loon MS, van den Akker M. Lonely patients in general practice: a call for revealing GPs' emotions? A qualitative study. *Family Practice* 2009;26(6):501-09. doi: 10.1093/fampra/cmp059
26. BBC World Hacks. The town with a plan to end loneliness.2018.
27. Zhou J, Walker A. The need for community care among older people in China. *Ageing & Society* 2016;36(6):1312-32.
28. Tian, Q. Community care for the elderly: comparative study based on welfare pluralism. Doctoral dissertation, 2010.
29. Cattan M, White M, Bond J, et al. Preventing social isolation and loneliness among older people: a systematic review of health promotion interventions. *Ageing & Society* 2005;25(1):41-67.

**Acknowledgements:** The authors gratefully acknowledge the contribution of previous investigators, past research team members, and staff in collaborating general practices and care homes, as well as the study respondents, their families and friends without whose help none of this research would be possible. In addition, we thank all the past sponsors for their financial support spanning two decades (see <http://www.cc75c.group.cam.ac.uk> for full list of project grants), most recently the BUPA Foundation for support under their Health and Care of Older People grant.

**Contributors:** HW proposed the research idea and conducted the analysis, as well as drafted the manuscript. CB critically reviewed the draft of this manuscript and provided input into analysis. EZ, JF, TD and K-TK provided feedback. JF and TD edited versions of the manuscript. All authors agreed to the submitted version of the paper.

**Funding:** This research received no specific grant from any funding agency in the public, commercial or not-for-profit sectors.

1  
2  
3 **Competing interests:** None declared.  
4

5 **Patient consent:** Obtained.  
6

7 **Ethics approval:** The study is approved by Cambridge ethics committee.  
8

9 **Data sharing statement:** No additional data available.  
10

11  
12 Figure 1. Overview of participation for current analysis  
13

14 Figure 2. Overview of statistical models  
15  
16  
17  
18  
19  
20  
21  
22  
23  
24  
25  
26  
27  
28  
29  
30  
31  
32  
33  
34  
35  
36  
37  
38  
39  
40  
41  
42  
43  
44  
45  
46  
47  
48  
49  
50  
51  
52  
53  
54  
55  
56  
57  
58  
59  
60

1  
2  
3  
4  
5  
6  
7  
8  
9  
10  
11  
12  
13  
14  
15  
16  
17  
18  
19  
20  
21  
22  
23  
24  
25  
26  
27  
28  
29  
30  
31  
32  
33  
34  
35  
36  
37  
38  
39  
40  
41  
42  
43  
44  
45  
46  
47  
48  
49  
50  
51  
52  
53  
54  
55  
56  
57  
58  
59  
60

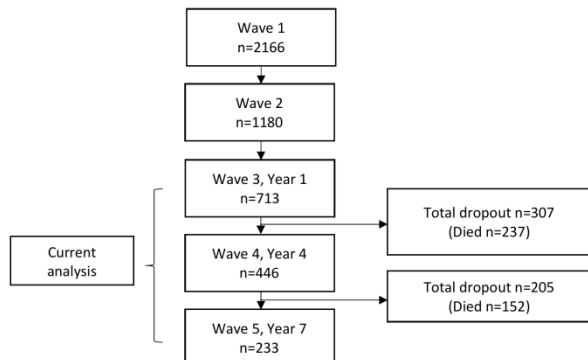

Figure 1. Overview of participation for current analysis

Figure 1. Overview of participation for current analysis

209x297mm (300 x 300 DPI)

1  
2  
3  
4  
5  
6  
7  
8  
9  
10  
11  
12  
13  
14  
15  
16  
17  
18  
19  
20  
21  
22  
23  
24  
25  
26  
27  
28  
29  
30  
31  
32  
33  
34  
35  
36  
37  
38  
39  
40  
41  
42  
43  
44  
45  
46  
47  
48  
49  
50  
51  
52  
53  
54  
55  
56  
57  
58  
59  
60

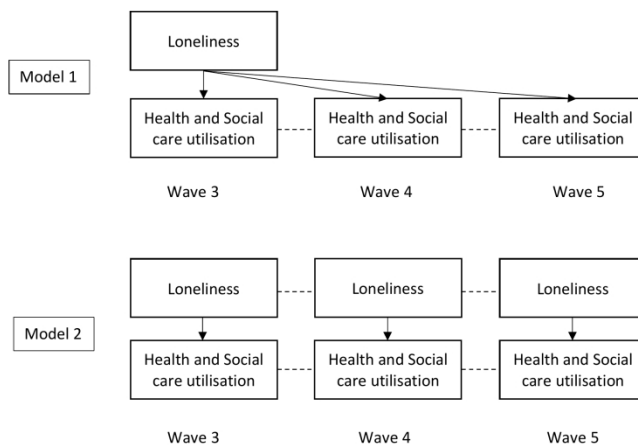

Figure 2. Overview of statistical models

Figure 2. Overview of statistical models

209x297mm (300 x 300 DPI)

## STROBE statement checklist

This manuscript was reported according to STROBE statement checklist. The corresponding answer to each item was labelled in Yellow. The answer indicated the page number in the main document against each criterion.

|                              | Item No | Recommendation                                                                                                                                                                                                                                                                                                                                                                                                                                                                                                                                                                                                                                                                                   |
|------------------------------|---------|--------------------------------------------------------------------------------------------------------------------------------------------------------------------------------------------------------------------------------------------------------------------------------------------------------------------------------------------------------------------------------------------------------------------------------------------------------------------------------------------------------------------------------------------------------------------------------------------------------------------------------------------------------------------------------------------------|
| <b>Title and abstract</b>    | 1       | (a) Indicate the study's design with a commonly used term in the title or the abstract                                                                                                                                                                                                                                                                                                                                                                                                                                                                                                                                                                                                           |
| <b>P. 1-2</b>                |         | (b) Provide in the abstract an informative and balanced summary of what was done and what was found                                                                                                                                                                                                                                                                                                                                                                                                                                                                                                                                                                                              |
| <b>Introduction P. 3</b>     |         |                                                                                                                                                                                                                                                                                                                                                                                                                                                                                                                                                                                                                                                                                                  |
| Background/rationale         | 2       | Explain the scientific background and rationale for the investigation being reported                                                                                                                                                                                                                                                                                                                                                                                                                                                                                                                                                                                                             |
| Objectives                   | 3       | State specific objectives, including any prespecified hypotheses                                                                                                                                                                                                                                                                                                                                                                                                                                                                                                                                                                                                                                 |
| <b>Methods P. 3-6</b>        |         |                                                                                                                                                                                                                                                                                                                                                                                                                                                                                                                                                                                                                                                                                                  |
| Study design                 | 4       | Present key elements of study design early in the paper                                                                                                                                                                                                                                                                                                                                                                                                                                                                                                                                                                                                                                          |
| Setting                      | 5       | Describe the setting, locations, and relevant dates, including periods of recruitment, exposure, follow-up, and data collection                                                                                                                                                                                                                                                                                                                                                                                                                                                                                                                                                                  |
| Participants                 | 6       | (a) <i>Cohort study</i> —Give the eligibility criteria, and the sources and methods of selection of participants. Describe methods of follow-up<br><i>Case-control study</i> —Give the eligibility criteria, and the sources and methods of case ascertainment and control selection. Give the rationale for the choice of cases and controls<br><i>Cross-sectional study</i> —Give the eligibility criteria, and the sources and methods of selection of participants<br>(b) <i>Cohort study</i> —For matched studies, give matching criteria and number of exposed and unexposed<br><i>Case-control study</i> —For matched studies, give matching criteria and the number of controls per case |
| Variables                    | 7       | Clearly define all outcomes, exposures, predictors, potential confounders, and effect modifiers. Give diagnostic criteria, if applicable                                                                                                                                                                                                                                                                                                                                                                                                                                                                                                                                                         |
| Data sources/<br>measurement | 8*      | For each variable of interest, give sources of data and details of methods of assessment (measurement). Describe comparability of assessment methods if there is more than one group                                                                                                                                                                                                                                                                                                                                                                                                                                                                                                             |
| Bias                         | 9       | Describe any efforts to address potential sources of bias                                                                                                                                                                                                                                                                                                                                                                                                                                                                                                                                                                                                                                        |
| Study size                   | 10      | Explain how the study size was arrived at                                                                                                                                                                                                                                                                                                                                                                                                                                                                                                                                                                                                                                                        |
| Quantitative variables       | 11      | Explain how quantitative variables were handled in the analyses. If applicable, describe which groupings were chosen and why                                                                                                                                                                                                                                                                                                                                                                                                                                                                                                                                                                     |
| Statistical methods          | 12      | (a) Describe all statistical methods, including those used to control for confounding<br>(b) Describe any methods used to examine subgroups and interactions<br>(c) Explain how missing data were addressed<br>(d) <i>Cohort study</i> —If applicable, explain how loss to follow-up was addressed<br><i>Case-control study</i> —If applicable, explain how matching of cases and controls was addressed<br><i>Cross-sectional study</i> —If applicable, describe analytical methods taking account of sampling strategy<br>(e) Describe any sensitivity analyses                                                                                                                                |

Continued on next page

| <b>Results</b>                        |     |                                                                                                                                                                                                                                                                                                                                                                                                               |
|---------------------------------------|-----|---------------------------------------------------------------------------------------------------------------------------------------------------------------------------------------------------------------------------------------------------------------------------------------------------------------------------------------------------------------------------------------------------------------|
| Participants                          | 13* | (a) Report numbers of individuals at each stage of study—eg numbers potentially eligible, examined for eligibility, confirmed eligible, included in the study, completing follow-up, and analysed<br>(b) Give reasons for non-participation at each stage<br>(c) Consider use of a flow diagram                                                                                                               |
| <b>P. 6</b>                           |     |                                                                                                                                                                                                                                                                                                                                                                                                               |
| Descriptive data                      | 14* | (a) Give characteristics of study participants (eg demographic, clinical, social) and information on exposures and potential confounders<br>(b) Indicate number of participants with missing data for each variable of interest<br>(c) <i>Cohort study</i> —Summarise follow-up time (eg, average and total amount)                                                                                           |
| <b>P. 6</b>                           |     |                                                                                                                                                                                                                                                                                                                                                                                                               |
| Outcome data                          | 15* | <i>Cohort study</i> —Report numbers of outcome events or summary measures over time<br><i>Case-control study</i> —Report numbers in each exposure category, or summary measures of exposure<br><i>Cross-sectional study</i> —Report numbers of outcome events or summary measures                                                                                                                             |
| <b>P. 9</b>                           |     |                                                                                                                                                                                                                                                                                                                                                                                                               |
| Main results                          | 16  | (a) Give unadjusted estimates and, if applicable, confounder-adjusted estimates and their precision (eg, 95% confidence interval). Make clear which confounders were adjusted for and why they were included<br>(b) Report category boundaries when continuous variables were categorized<br>(c) If relevant, consider translating estimates of relative risk into absolute risk for a meaningful time period |
| <b>P. 7-10</b>                        |     |                                                                                                                                                                                                                                                                                                                                                                                                               |
| Other analyses                        | 17  | Report other analyses done—eg analyses of subgroups and interactions, and sensitivity analyses                                                                                                                                                                                                                                                                                                                |
| <b>Discussion</b> <b>P. 11-13</b>     |     |                                                                                                                                                                                                                                                                                                                                                                                                               |
| Key results                           | 18  | Summarise key results with reference to study objectives                                                                                                                                                                                                                                                                                                                                                      |
| Limitations                           | 19  | Discuss limitations of the study, taking into account sources of potential bias or imprecision. Discuss both direction and magnitude of any potential bias                                                                                                                                                                                                                                                    |
| Interpretation                        | 20  | Give a cautious overall interpretation of results considering objectives, limitations, multiplicity of analyses, results from similar studies, and other relevant evidence                                                                                                                                                                                                                                    |
| Generalisability                      | 21  | Discuss the generalisability (external validity) of the study results                                                                                                                                                                                                                                                                                                                                         |
| <b>Other information</b> <b>P. 15</b> |     |                                                                                                                                                                                                                                                                                                                                                                                                               |
| Funding                               | 22  | Give the source of funding and the role of the funders for the present study and, if applicable, for the original study on which the present article is based                                                                                                                                                                                                                                                 |

# BMJ Open

## Is loneliness associated with increased health and social care utilisation in the oldest old? Findings from a population-based longitudinal study

|                                 |                                                                                                                                                                                                                                                                                                                                                                                                                                                                                                 |
|---------------------------------|-------------------------------------------------------------------------------------------------------------------------------------------------------------------------------------------------------------------------------------------------------------------------------------------------------------------------------------------------------------------------------------------------------------------------------------------------------------------------------------------------|
| Journal:                        | <i>BMJ Open</i>                                                                                                                                                                                                                                                                                                                                                                                                                                                                                 |
| Manuscript ID                   | bmjopen-2018-024645.R1                                                                                                                                                                                                                                                                                                                                                                                                                                                                          |
| Article Type:                   | Research                                                                                                                                                                                                                                                                                                                                                                                                                                                                                        |
| Date Submitted by the Author:   | 24-Jan-2019                                                                                                                                                                                                                                                                                                                                                                                                                                                                                     |
| Complete List of Authors:       | Wang, Hanyuying; Institute of Public Health, University of Cambridge<br>Zhao, Emily<br>Fleming, Jane; University of Cambridge, Cambridge Institute of Public Health; University of Cambridge, Department of Public Health and Primary Care<br>Denning, Tom; University of Nottingham, Division of Psychiatry & Applied Psychology<br>Khaw, Kay-Tee; University of Cambridge, Department of Public Health and Primary Care<br>Brayne, Carol; University of Cambridge, Institute of Public Health |
| <b>Primary Subject Heading</b>: | Public health                                                                                                                                                                                                                                                                                                                                                                                                                                                                                   |
| Secondary Subject Heading:      | Health services research                                                                                                                                                                                                                                                                                                                                                                                                                                                                        |
| Keywords:                       | Loneliness, Health service, Social care, The oldest old                                                                                                                                                                                                                                                                                                                                                                                                                                         |
|                                 |                                                                                                                                                                                                                                                                                                                                                                                                                                                                                                 |

SCHOLARONE™  
Manuscripts

1  
2  
3 **Is loneliness associated with increased health and social care utilisation in the oldest**  
4 **old? Findings from a population-based longitudinal study**  
5  
6  
7

8  
9 Hanyuying Wang<sup>1</sup>, Emily Zhao<sup>1</sup>, Jane Fleming<sup>1</sup>, Tom Dening<sup>2</sup>, Kay-Tee Khaw<sup>3</sup>, Carol  
10 Brayne<sup>1,3</sup> on behalf of the CC75C study collaboration  
11

- 12  
13 1. Institute of Public Health, University of Cambridge, Cambridge, UK  
14 2. Division of Psychiatry & Applied Psychology, School of Medicine, University of  
15 Nottingham, Nottingham, UK  
16 3. Department of Public Health and Primary Care, Cambridge, UK  
17  
18  
19  
20  
21

22 Corresponding author

23 Hanyuying Wang

24 Institute of Public Health

25 Forvie Site, Robinson Way

26 Cambridge, CB2 0SR

27 Email: [hw448@medschl.cam.ac.uk](mailto:hw448@medschl.cam.ac.uk)

28 Tel: 07843853914  
29  
30  
31  
32  
33

34 Word count: 3592  
35  
36  
37  
38  
39  
40  
41  
42  
43  
44  
45  
46  
47  
48  
49  
50  
51  
52  
53  
54  
55  
56  
57  
58  
59  
60



## Abstract

**Objectives** The present study aimed to examine the impact of loneliness on health and social care service use in the oldest old over a 7-year follow-up.

**Design** Prospective study.

**Setting** UK population-based cohort

**Participants** 713 people aged 80 years or older were interviewed at wave 3 of the Cambridge City over-75s Cohort Study (CC75C). Of these, 665 provided data on loneliness. During 7 years' follow-up 480 participants left the study, of which 389 due to death. 162 still in the study answered the loneliness question.

**Main outcome measure** Use of health and social care services, assessed at each wave from wave 3 to wave 5

**Results** At wave 3, of 665 participants who had data on loneliness, about 60% did not feel lonely, 16% felt slightly lonely and 25% felt lonely. Being slightly lonely at wave 3 was associated with a shorter time since last seeing a GP ( $\beta=-0.5$ , 95%CI: -0.8, -0.2); When examining the association between time-varying loneliness and health and social care usage, being lonely was associated with three times greater likelihood of having contact with community nurses and using meals on wheels services (community nurse contact: IRR=3.4, 95%CI: 1.4, 8.7; meals on wheels service use: IRR=2.5, 95%CI: 1.1, 5.6). No associations between loneliness and other health and social care services use were found.

**Conclusion** Loneliness was a significant risk factor for certain types of health and social care utilisations, independently of participants' health conditions, in the oldest old. Study findings have several implications, including the need for awareness-raising and prevention of loneliness to be priorities for public health policy and practice.

**Keywords** Loneliness, health service, social care, the oldest old

### Strengths and limitations of this study

- Study participants were from one of the longest-run prospective cohort studies of the very old; a wide range of important confounders were adjusted for.
- Loneliness and health and social care utilisation were measured repeatedly during follow-up, so associations between time-varying loneliness and health and social care usage can be examined.
- Dropout and missing data were adjusted for by using inverse probability weighting
- Findings from the current study might not generalise to all older populations because the CC75C recruited men and women living in only one city.

## Introduction

Loneliness is an unpleasant feeling resulting from the mismatch between individuals' obtained social relationships and desired ones. It is commonly experienced by older people. Previous studies have reported that at any given time, about one quarter of individuals aged 65-79 reported feeling lonely, and the percentage feeling loneliness increased to about 40% among individuals aged 80 and over[1]. There have been consistent reports both from longitudinal and cross-sectional studies on the association of loneliness with mental health[2], cognitive decline[3-4], poor physical health[5-7] and mortality[8-9]. Those on mental health have been consistent across age groups studied.

Because of the strong relationships between loneliness and health outcomes, and the associations between adverse health and use of health and social services, there has been much interest in exploring the role of loneliness as an independent risk factor for health service and social care utilisation. However, findings from previous studies have been inconsistent. Using data from the Health and Retirement Study (HRS), researchers investigated whether loneliness was related to increased frequency of physician visits and hospital admission over a 4-year follow-up, and found that loneliness was significantly associated with physician visits but not hospital admission[10]. However, a longitudinal study following up Canadian community-dwelling elders for 2.5 years did not find any associations between loneliness and physician visits or hospitalization[11]. The heterogeneity in existing evidence is likely to be due to the differences in study sample, selection of covariates, length of follow-up time, and the measures of loneliness. On the other hand, most studies focused on the general older population (aged 65 and over) with the oldest old (aged 80 and over) under-represented. Compared to the young old, the oldest old are at greater risk of losing family members and friends, experiencing physical or mental health decline, and therefore, are more vulnerable to changes in both loneliness and health, consequently, their demand for health and social care services is greater. Moreover, to the best of our knowledge, only one longitudinal study examined the impact of loneliness on health and social care service use by using repeated assessments (loneliness was measured at two time points in that study) over time[10]. However, with only two measures, researchers were not able to capture the fluctuating nature of loneliness[12-14], therefore, the complicated association between time-varying loneliness and health and social care utilisation could not be examined.

The current study aims to address two main questions. First, whether loneliness at baseline is associated with health and social care service use, and second, when loneliness was assessed at different times, whether there are relationships between time-varying loneliness and health and social care service use.

## Method

### Study sample

Participants were from wave 3 to wave 5 of the Cambridge City over-75s Cohort Study (CC75C), a population-based prospective cohort study of individuals aged 75 or older. The detailed description of this study can be found elsewhere[15]. Briefly, in 1985, 2610 men and women aged 75 and over from geographically and socially representative general practices in Cambridge were recruited with a high response rate (95% in six of the seven general practices), of whom 2166 were at the initial wave of this study (444 were excluded due to different recruitment or participation in a concurrent intervention study). This group of

1  
2  
3 individuals was then surveyed by trained lay interviewers using a similar questionnaire every  
4 3 or 4 years, and in total, 10 waves of data have been collected. Written informed consent  
5 was obtained from all participants (or from their proxy informants for those who were frail).  
6 This study was approved before each survey wave by Cambridge Research Ethics  
7 Committee. Patient and public involvement was not considered in the early 1980s at the  
8 design stage of the cohort study which collected the data in these analyses. Participants and  
9 their families were kept informed of study findings with regular newsletters. Figure 1  
10 describes the overview of participation for current analysis.  
11  
12

### 13 **Patient and Public Involvement**

14  
15  
16 Patient and public involvement was not considered in the early 1980s at the design stage of  
17 the cohort study which collected the data in these analyses. Participants and their families  
18 were kept informed of study findings with regular newsletters.  
19

### 20 **Measures**

#### 21 **Health and social care utilisation**

22  
23  
24  
25 The health and social care utilisation included in this study consisted of community service  
26 contacts, hospital visits and general practice (GP) visits. The community service contact  
27 comprised the number of self-reported contacts with a home help, community nurse, meals  
28 on wheels or day centre in the past week. For each service more than six contacts a week  
29 were coded as six. Hospital visits was assessed by asking participants how many times they  
30 had been in hospital in the past year, coded 0, 1 or 2 with this maximum score reflecting two  
31 or more, due to the small frequency of more frequent visits. As an indicator of frequency of  
32 GP visits participants were asked how long it had been since they last saw a GP; answers  
33 were recorded in months up to a maximum of 98. In analyses, community service contact and  
34 hospital visit responses were treated as count variables, and time since last GP visit was  
35 treated as a continuous variable.  
36  
37

#### 38 **Loneliness**

39  
40  
41 At each wave, loneliness was assessed by a single question 'Do you feel lonely?', with  
42 response options 'not at all lonely', 'slightly lonely', 'lonely', and 'very lonely'. In analyses,  
43 due to the small number of participants who reported feeling lonely or very lonely, these two  
44 categories were then combined as one category: 'lonely'. Therefore, loneliness was divided  
45 into three levels here: 'not lonely' (indicates 'not at all lonely'), 'slightly lonely' and 'lonely'  
46 (indicates 'lonely' and 'very lonely'). The single-item scale was used widely in European  
47 studies, and it has been reported that it was adopted well by the older population[16].  
48  
49

#### 50 **Covariates**

51  
52  
53 The covariates included in analyses were demographics and variables associated with  
54 loneliness and health outcomes. They were age (80-84, 85-89, and 90+), sex (men as the  
55 reference), physical impairments (measured through a series of self-reported or proxy-  
56 reported conditions, including poor vision, poor hearing, arthritis/rheumatism, back pain,  
57 chest pain, shortness of breath, marked weakness in arms or leg, unsteady on feet, tendency  
58 to fall, trouble with nerves and others; the total score was the sum of score for each condition  
59 and categorised into low, moderate and severe levels based on 25%, 50% and 75%  
60

percentiles), number of chronic diseases (included self-reported doctor-diagnosed angina, heart attack, circulation problems in legs, high blood pressure, chronic bronchitis, stroke, sudden weakness or difficulty with speech, memory or vision, sugar diabetes, thyroid problems, severe headaches or migraine and others; categorised into 0-2 or  $\geq 3$  conditions), depression (measured by a series of questions derived from the Cambridge Examination for Mental Disorders in the Elderly (CAMDEX)[17], the total score ranged from 0-10, and depression was defined if score  $\geq 6$ ), physical functioning (assessed by participants' responses to questions on activities of daily living (ADL), and categorised into no disability, instrumental ADL (IADL) disability only or disability in both basic ADLs & IADLs)[18], and cognition (assessed by Mini-Mental Status Examination (MMSE), score ranged from 0-30). All covariates were measured at wave 3.

### Statistical analysis

The current analyses included participants who had provided data on loneliness at wave 3. Loneliness non-response at wave 3 was adjusted by inverse probability weighting. The calculation was modelled on variables associated with loneliness missingness. The characteristics of the sample were described according to their wave 3 loneliness level after adjusting for non-response.

To examine the association between loneliness and health and social care utilisation over a 7-year follow-up, Generalized Estimating Equations (GEE) with independent variance matrix and negative binomial family were fitted to model count outcomes, and GEE with independent variance matrix with Gamma family was used to model the continuous outcome. The use of GEE with independent variance matrix is expected to ensure the target for inference is based on the mortal cohort (living population at each wave)[19-20]. The use of negative binomial modelling for count responses can help with overdispersion control in the data[21]. The choice of Gamma family for modelling the continuous outcome was because the distribution of continuous variable "time since last visiting a GP" was not normally distributed and fits into one of the Gamma distribution shapes, a Gamma distribution was therefore assumed. Two types of associations were tested. First, the association between baseline loneliness (measured at wave 3) and health and social care usage (repeated measurements at waves 3, 4, 5) was explored, and then the association between loneliness as a time-varying predictor (measured at wave 3, 4, 5) and health and social care usage was investigated (again, repeated measurements at wave 3, 4, 5) (Figure 2). In both analyses, time was entered (i.e.  $t=1, 2, 3$ ) to reflect the order of the three repeated measurements. Both analyses were adjusted for covaries.

To adjust for dropout during follow-up, the inverse probability weighting was calculated based on probability of staying in the study on the condition of responding to the previous wave and being alive at the current wave[19,22-24]. As participants in this study were followed up from wave 3 onwards, cross-sectional weight adjusting for dropout before wave 3 was calculated. Taken together, a final weight was calculated by multiplying wave 3 cross-sectional weight, weight adjusting for loneliness non-response at wave 3 and longitudinal weight, and implemented in longitudinal analyses.

Because several covariates included in the analyses were health-related, such as physical impairment, physical functioning and number of chronic diseases; despite that they were collected in distinctive ways, a sensitivity analysis was performed to test the impact of

1  
2  
3 loneliness on health and social service use adjusting only for physical functioning. The  
4 results of the sensitivity analysis were available upon request.  
5

6 All analyses were implemented in Stata v13.1 (StataCorp LP, College Station, TX, USA). A  
7 p-value <0.05 was considered statistically significant.  
8  
9

## 10 11 **Results**

12  
13 During the 7-year follow-up n=480/713 (67%) participants dropped out from study, and  
14 n=389 out of 480 (81%) dropped out due to mortality (Figure 1). At wave 3, n=393  
15 participants reported they were not lonely and, of those reporting any degree of loneliness,  
16 n=107 and n=165 said they felt “slightly lonely” and “lonely”, respectively (Table 1). For  
17 48/713 (7%) participants with no valid response to the loneliness question at wave 3, n=35  
18 were proxy informant interviews. Over half of participants were aged at least 85 years old,  
19 most were women, had a moderate level of physical impairment, had less than 3 chronic  
20 diseases, and were not depressed. About 40% of participants did not have any disabilities,  
21 while approximately 35% suffered from both IADL and ADL disabilities. The average  
22 MMSE score was 23.  
23  
24  
25

26 Table 2 shows the weighted percentage of participants in each category by loneliness level  
27 measured at wave 3. The prevalence of feeling lonely was high among women and  
28 individuals who had a moderate to high level of physical impairment, were depressed and had  
29 disabilities in IADL & ADL (Table 2).  
30  
31  
32  
33  
34  
35  
36  
37  
38  
39  
40  
41  
42  
43  
44  
45  
46  
47  
48  
49  
50  
51  
52  
53  
54  
55  
56  
57  
58  
59  
60

Table 1 Participants' characteristics at wave 3

| Characteristics                   | No. of Participants | % of Participants |
|-----------------------------------|---------------------|-------------------|
|                                   | 665                 | 100               |
| <b>Loneliness</b>                 |                     |                   |
| Not lonely                        | 393                 | 59                |
| Slightly lonely                   | 107                 | 16                |
| Lonely                            | 165                 | 25                |
| <b>Age</b>                        |                     |                   |
| 80-84                             | 304                 | 46                |
| 85-89                             | 267                 | 40                |
| 90+                               | 94                  | 14                |
| <b>Sex</b>                        |                     |                   |
| Men                               | 207                 | 31                |
| Women                             | 458                 | 69                |
| <b>Physical impairment</b>        |                     |                   |
| Low                               | 227                 | 35                |
| Moderate                          | 292                 | 45                |
| High                              | 130                 | 20                |
| <b>Number of chronic diseases</b> |                     |                   |
| 0-2                               | 409                 | 64                |
| >=3                               | 228                 | 36                |
| <b>Depression</b>                 |                     |                   |
| No                                | 538                 | 87                |
| Yes                               | 78                  | 13                |
| <b>Physical functioning</b>       |                     |                   |
| No disability                     | 249                 | 38                |
| IADL disability only              | 176                 | 27                |
| IADL & ADL disability             | 231                 | 35                |
| <b>Cognition</b> *                | 23 (6) <sup>+</sup> | -                 |

Note: \* cognition was measured as a continuous variable ranging from 1-30 with higher score indicating better cognition. <sup>+</sup>: mean±SD. Because of the missing data, the sum of column data for certain variables may not equal to 665.

Table 2. The distribution of baseline characteristics by loneliness level (weight<sup>ψ</sup> applied)

| Characteristics                   | Not lonely | Slightly lonely | Lonely | p-value |
|-----------------------------------|------------|-----------------|--------|---------|
|                                   | 59%        | 16%             | 25%    |         |
| <b>Age</b>                        |            |                 |        |         |
| 80-84                             | 63%        | 16%             | 21%    | 0.26    |
| 85-89                             | 55%        | 18%             | 27%    |         |
| 90+                               | 57%        | 13%             | 30%    |         |
| <b>Sex</b>                        |            |                 |        |         |
| Men                               | 71%        | 12%             | 17%    | <.001   |
| Women                             | 53%        | 18%             | 29%    |         |
| <b>Physical impairment</b>        |            |                 |        |         |
| Low                               | 76%        | 12%             | 12%    | <.001   |
| Moderate                          | 59%        | 15%             | 26%    |         |
| High                              | 37%        | 23%             | 40%    |         |
| <b>Number of chronic diseases</b> |            |                 |        |         |
| 0-2                               | 63%        | 16%             | 21%    | 0.13    |
| ≥ 3                               | 56%        | 16%             | 28%    |         |
| <b>Depression</b>                 |            |                 |        |         |
| No                                | 65%        | 15%             | 20%    | <.001   |
| Yes                               | 25%        | 24%             | 51%    |         |
| <b>Physical functioning</b>       |            |                 |        |         |
| No disability                     | 59%        | 18%             | 23%    | <.05    |
| IADL disability only              | 70%        | 12%             | 18%    |         |
| IADL & ADL disabilities           | 54%        | 17%             | 29%    |         |
| <b>Cognition (mean±SD)</b>        |            |                 |        |         |
| MMSE                              | 22 (6)     | 22 (6)          | 21 (7) | 0.7     |

Note: <sup>ψ</sup> weight: the product of wave 3 cross-sectional weight and weight adjusted for non-response at wave 3.

In terms of associations between baseline loneliness and health and social care utilisation, the only significant association was that feeling slightly lonely was positively associated with GP visits after adjusting for demographic characteristics and health problems (Table 3). Neither feeling lonely nor feeling slightly lonely were found to be related to home help use, community nurse contacts, meals on wheels service use, day centre or hospital visits. Results also indicated that moderate and high levels of physical impairment were significantly associated with home help use and with hospital visits. Having three or more chronic diseases was associated with community nurse contacts. Having disabilities in both IADL & ADL was related to increased frequency of day centre visits. On the other hand, depression was significantly and negatively associated with day centre visits. However, being depressed was associated with shorter time since last seeing a GP. Moreover, being female and having at least three chronic diseases was also associated with GP visits.

Table 3. Associations between baseline loneliness and health and social care utilisation

|                             | Home Help             | Community Nurse      | Meals on Wheels | Day centre            | Hospital visits      | Time since last saw a GP |
|-----------------------------|-----------------------|----------------------|-----------------|-----------------------|----------------------|--------------------------|
|                             | IRR (95% CI)          | IRR (95% CI)         | IRR (95% CI)    | IRR (95% CI)          | IRR (95% CI)         | Beta (95% CI)            |
| Time                        | 1.1 (0.4-2.8)         | 2.5 (0.9-6.9)        | 1.1 (0.4-2.8)   | 0.9 (0.3-2.6)         | 1.5 (0.7-3.0)        | 0.1 (-0.3, 0.6)          |
| <b>Loneliness (wave 3)</b>  |                       |                      |                 |                       |                      |                          |
| Slightly lonely             | 1.3 (0.5-3.6)         | 0.6 (0.2-2.2)        | 1.9 (0.8-4.9)   | 1.6 (0.5-5.0)         | 1.3 (0.8-2.1)        | <b>-0.5 (-0.8, -0.2)</b> |
| Lonely                      | 2.4 (0.8-7.3)         | 1.1 (0.5-2.5)        | 2.0 (0.9-4.5)   | 1.4 (0.3-5.3)         | 1.2 (0.8-1.9)        | -0.1 (-0.5, 0.3)         |
| <b>Age</b>                  |                       |                      |                 |                       |                      |                          |
| 85-89                       | 0.5 (0.2-1.1)         | 0.8 (0.4-1.9)        | 0.8 (0.4-1.7)   | 1.0 (0.4-2.3)         | 0.7 (0.5-1.1)        | 0.2 (-0.1, 0.5)          |
| 90+                         | 0.9 (0.2-3.9)         | 0.9 (0.3-2.6)        | 0.6 (0.1-3.6)   | 1.6 (0.1-19.9)        | 1.3 (0.6-2.9)        | 0.02 (-0.6, 0.7)         |
| <b>Sex</b>                  |                       |                      |                 |                       |                      |                          |
| Women                       | 1.3 (0.5-3.2)         | 0.7 (0.3-2.0)        | 0.8 (0.4-2.0)   | 1.4 (0.6-3.4)         | 0.7 (0.4-1.1)        | <b>-0.5 (-0.8, -0.1)</b> |
| <b>Physical impairments</b> |                       |                      |                 |                       |                      |                          |
| Moderate                    | <b>2.3 (0.96-5.4)</b> | 2.2 (0.9-5.1)        | 0.6 (0.2-1.5)   | 1.6 (0.4-5.8)         | 1.3 (0.8-2.1)        | -0.2 (-0.5, 0.2)         |
| High                        | <b>3.9 (1.5-10.6)</b> | 2.0 (0.8-5.1)        | 1.9 (0.8-4.6)   | 3.2 (0.7-13.6)        | <b>2.5 (1.4-4.6)</b> | -0.3 (-0.7, 0.1)         |
| <b>Health condition</b>     |                       |                      |                 |                       |                      |                          |
| ≥ 3                         | 1.5 (0.7-3.3)         | <b>2.4 (1.1-5.0)</b> | 1.2 (0.6-2.5)   | 2.1 (0.7-6.5)         | 1.1 (0.7-1.7)        | <b>-0.3 (-0.6, -0.1)</b> |
| <b>Depression</b>           |                       |                      |                 |                       |                      |                          |
| Yes                         | 0.6 (0.2-1.6)         | 0.6 (0.2-1.9)        | 0.5 (0.2-1.5)   | <b>0.3 (0.1-1.0)</b>  | 1.1 (0.5-2.2)        | <b>-0.4 (-0.8, -0.1)</b> |
| <b>Physical functioning</b> |                       |                      |                 |                       |                      |                          |
| IADL disability only        | 2.4 (0.9-6.4)         | 1.0 (0.3-3.2)        | 0.8 (0.3-2.6)   | 2.4 (0.9-6.3)         | 0.7 (0.4-1.2)        | -0.3 (-0.7, 0.1)         |
| IADL & ADL disabilities     | 2.3 (0.9-6.2)         | 1.6 (0.6-3.9)        | 1.5 (0.6-3.7)   | <b>2.9 (0.96-8.9)</b> | 1.0 (0.6-1.7)        | 0.1 (-0.2, 0.4)          |
| <b>Cognition</b>            | 0.9 (0.8-1.1)         | 1.0 (0.9-1.1)        | 0.9 (0.8-1.1)   | 1.0 (0.8-1.1)         | 1.0 (0.9-1.1)        | -0.05 (-0.1, 0.01)       |

Reference groups: not lonely, 80-84 years old, men, no physical impairments, 0-2 chronic diseases, not depressed, and not disabled.

IRR: incidence rate ratio.



Table 4. Association between time-varying loneliness and health and social care utilisation

|                             | Home Help              | Community Nurse       | Meals on Wheels       | Day centre             | Hospital visits         | Time since last saw a GP  |
|-----------------------------|------------------------|-----------------------|-----------------------|------------------------|-------------------------|---------------------------|
|                             | IRR (95% CI)           | IRR (95% CI)          | IRR (95% CI)          | IRR (95% CI)           | IRR (95% CI)            | Beta (95% CI)             |
| Time                        | 1.0 (0.4, 2.5)         | 2.3 (0.9, 5.8)        | 1.0 (0.4, 2.6)        | 1.4 (0.4, 4.9)         | 1.3 (0.7, 2.6)          | 0.1 (-0.3, 0.5)           |
| <b>Loneliness</b>           |                        |                       |                       |                        |                         |                           |
| Slightly lonely             | 1.2 (0.5, 2.9)         | 0.8 (0.3, 2.6)        | 1.6 (0.6, 3.8)        | 1.7 (0.5, 5.5)         | 1.4 (0.9, 2.1)          | -0.3 (-0.6, 0.1)          |
| Lonely                      | 2.0 (0.8, 4.9)         | <b>3.4 (1.4, 8.7)</b> | <b>2.5 (1.1, 5.6)</b> | 1.4 (0.4, 5.3)         | 1.5 (0.9, 2.4)          | -0.2 (-0.5, 0.1)          |
| <b>Age</b>                  |                        |                       |                       |                        |                         |                           |
| 85-89                       | 0.5 (0.2, 1.1)         | 0.8 (0.3, 1.9)        | 1.0 (0.5, 2.0)        | 1.0 (0.4, 2.5)         | 0.7 (0.5, 1.2)          | 0.2 (-0.1, 0.5)           |
| 90+                         | 0.9 (0.2, 4.4)         | 1.3 (0.4, 4.7)        | 0.6 (0.1, 5.9)        | 4.2 (0.3, 51.7)        | 1.0 (0.4, 2.7)          | 0.1 (-0.6, 0.7)           |
| <b>Sex</b>                  |                        |                       |                       |                        |                         |                           |
| Women                       | 1.2 (0.5, 3.1)         | 0.5 (0.2, 1.5)        | 0.8 (0.3, 1.9)        | 1.4 (0.5, 4.0)         | <b>0.6 (0.4, 1.002)</b> | <b>-0.5 (-0.9, -0.2)</b>  |
| <b>Physical impairments</b> |                        |                       |                       |                        |                         |                           |
| Moderate                    | 2.3 (0.9, 5.7)         | 1.9 (0.8, 4.5)        | 0.7 (0.2, 2.0)        | 4.0 (0.7, 23.4)        | 1.3 (0.8, 2.1)          | -0.1 (-0.5, 0.2)          |
| High                        | <b>4.1 (1.6, 10.8)</b> | 1.4 (0.4, 4.5)        | 1.9 (0.7, 5.3)        | <b>7.6 (1.2, 48.7)</b> | <b>2.3 (1.2, 4.4)</b>   | -0.3 (-0.7, 0.1)          |
| <b>Health condition</b>     |                        |                       |                       |                        |                         |                           |
| ≥3                          | 1.5 (0.7, 3.3)         | <b>2.6 (1.2, 5.5)</b> | 1.2 (0.6, 2.6)        | 2.3 (0.6, 8.7)         | 1.2 (0.8, 1.9)          | <b>-0.3 (-0.6, -0.1)</b>  |
| <b>Depression</b>           |                        |                       |                       |                        |                         |                           |
| Yes                         | 0.6 (0.2, 1.6)         | 0.5 (0.2, 1.5)        | 0.5 (0.2, 1.7)        | 0.3 (0.1, 1.1)         | 1.1 (0.5, 2.1)          | <b>-0.4 (-0.8, -0.03)</b> |
| <b>Physical functioning</b> |                        |                       |                       |                        |                         |                           |
| IADL disability only        | 2.1 (0.8, 5.6)         | 0.9 (0.3, 2.7)        | 0.8 (0.2, 2.6)        | 2.7 (0.9, 8.5)         | 0.7 (0.4, 1.3)          | -0.3 (-0.7, 0.1)          |
| IADL & ADL disabilities     | 2.3 (0.8, 6.3)         | 1.0 (0.4, 2.5)        | 1.5 (0.5, 4.5)        | 2.1 (0.7, 6.7)         | 1.0 (0.6, 1.7)          | 0.2 (-0.1, 0.5)           |
| <b>Cognition</b>            | 0.9 (0.8, 1.0)         | 0.9 (0.8, 1.0)        | 0.9 (0.8, 1.1)        | 1.1 (0.9, 1.2)         | 1.0 (0.9, 1.1)          | -0.05 (-0.1, 0.0003)      |

Reference groups: not lonely, 80-84 years old, men, no physical impairments, 0-2 chronic diseases, not depressed, and not disabled.

IRR: incidence rate ratio.

1  
2  
3 Table 4 presents the results of time-varying loneliness for health and social care usage.  
4 Individuals who felt lonely were three times more likely to contact the community nurse and  
5 use the meals on wheels service than non-lonely individuals, respectively. The other variables  
6 that were significantly associated with health and social care utilisation were similar to those  
7 in the analyses exploring the association between baseline loneliness and health and social  
8 care usage, except that the significance of the associations between depression, disabilities in  
9 IADL & ADL and day centre visits disappeared; instead, the high level of physical  
10 impairment was found to be significantly related to day centre visits.  
11  
12  
13  
14  
15  
16  
17  
18  
19  
20  
21  
22  
23  
24  
25  
26  
27  
28  
29  
30  
31  
32  
33  
34  
35  
36  
37  
38  
39  
40  
41  
42  
43  
44  
45  
46  
47  
48  
49  
50  
51  
52  
53  
54  
55  
56  
57  
58  
59  
60

For peer review only

## Discussion

Results from this study indicate that loneliness is a significant risk factor for certain types of health and social care services among the oldest old regardless of health problems. In particular, feeling slightly lonely at baseline was associated with a shorter time since last GP visiting; when modelling the association between repeated measures of loneliness and health and social care usage, feeling lonely was found to be significantly associated with increased contacts with the community nurse and use of a meals on wheels service. The results from the sensitivity analysis did not differ from the presented results substantively, generally supporting the conclusions made based on the current analysis.

The finding of loneliness and its association with GP visits is consistent with the finding from a previous UK population-based study, though there are slight differences between the two studies. In our study, compared to non-lonely individuals, we found that those who felt slightly lonely had a shorter time interval since they last visited their GP; in their study, they found that individuals who felt lonely tended to visit GPs about twice as often as individuals who were not lonely[25]. The explanations for the link between loneliness and frequent GP visits might include that GPs are the first point of call for multiple care needs, and more importantly, the GP healthcare system is intended to allow GPs to build a long-term relationship with their patients. GPs therefore may be familiar with their patients' health conditions and even emotional changes, and consequently trust can be built within this relationship. Indeed, Ellaway and colleagues explained that older people who felt lonely and did not have family members or friends around them tended to regard their GPs as their confidants[25]. Similarly, data from the 'Campaign to End Loneliness' suggest that more than 75% of GPs and one in ten hospital doctors reported seeing about 1 to 5 or 1 to 6 lonely people in a day[26]. These findings imply that numerous lonely individuals are aware of their loneliness and have self-motivations to alleviate loneliness. Seeking advice from trusted GPs may give them a sense of hope and safety. Findings also highlight the importance of emotional support (e.g. having confidants) in the experience of loneliness.

To the best of our knowledge, this is the first time the associations between loneliness and community nurse contacts and use of a meals on wheels service have been studied. Although potentially indicating that these types of service use are markers for levels of poor health and disability associated with greater loneliness, the associations remained after controlling for numbers of health conditions. The independent significance of these associations could imply that similar with GPs, community nurses or meals on wheels service providers may have a hidden role in providing social interactions. For example, in a fixed randomized control study investigating the role of home-delivered meals programme on 626 American community-dwelling seniors' feelings of loneliness, researchers reported that compared to control groups (i.e. individuals who received meal delivery once a week and individuals remained on meal delivery waiting list), those who received their meals delivery on a daily basis experienced decreases in their loneliness, and the reduction was explained as the meal-delivery services indirectly provided more opportunities to elders for social interactions[27].

This study has several strengths. The use of data from one of the longest-run prospective cohort studies of the very old allows us to measure loneliness and outcome variables at different time points; by using the repeated measurements, we can therefore examine the association between loneliness and health and social care utilisation more thoroughly. Moreover, CC75C collected data on different types of health and social care services, which enables us to investigate the impact of loneliness on health and social care utilisation in a

broader way than previous studies did. Furthermore, the use of weights can minimise the effect of non-response to the findings and reduce bias due to drop out[20].

However, caution should be taken when interpreting the findings. The use of self-reported health service and social care utilisation may introduce recall bias. However, it is unlikely to have effects on our findings as for most interviewed participants, their proxy informants were also interviewed, and answers from both were compared and the most reliable answers (i.e. if answers were different, then proxy informants' answers were selected for participants who had cognitive problems) to minimize the differences. Responses about health and social care service use were coded with maximum values, without recording the true maximum. It is possible that some participants are heavy users of services, resulting in higher service use than measured here. It is possible that this led to a loss of ability to identify relationships for heavy users of services, and no sensitivity analyses are possible to test this. However, for each type of health and social service, the largest proportion of participants who were in the maximum category was less than 6%. Therefore, results from the current study are unlikely to be influenced by the extreme values of service use. Additionally, the use of a single-item scale to assess loneliness may under-estimate the true prevalence of loneliness as participants might be concerned about social stigma, but it has been reported that single-item scales have advantages in implementation in large studies and have good reliability among older people[16]. Another consideration is that, as in previous studies[10], we included disability as one of the covariates, and it was determined by whether participants needed help from family, friends or neighbours for performing at least one of their daily activities, such as cooking or doing housework. This type of help can be regarded as informal care, therefore it is possible that participants who can obtain informal care may use fewer community services. Medication use may also serve as a confounder in this analysis, as individuals who are taking prescribed medications may need to visit their GPs more regularly. However, because of the unavailability of relevant data, we were unable to adjust for this variable. Although this might dilute the association between loneliness and health care utilisation, it was unlikely to change the direction of the association.

This finding has implications for public health and practice. As noted earlier, lonely individuals visit their GPs more frequently than non-lonely individuals. They expect emotional supports and professional advice from their GPs to alleviate feelings of loneliness. However, from GPs' point of view, they are burdened with lack of therapeutic options. This might be due to the fact that feeling lonely reflects individuals' personal experience, therefore, the trigger for loneliness varies between individuals. Moreover, the coping skills differ from individuals. In addition, GPs need to deal with time issues, e.g. lack of time. Taken together, the limited options to support people affected with loneliness and lack of time make it difficult for GPs to help with lonely patients[28]. This raises an urgent need for developing professional service that specifically target on loneliness, so that GPs can refer their lonely patients to appropriate help. Indeed, in a recent programme 'The town with a plan to end loneliness' aired by the BBC, a programme presenter pointed out that the medical centre not only is responsible for giving medical advice, but also should listen to patients' non-medical needs and connect them to people who can help[29].

In addition, the finding that loneliness was associated with increased use of community services, such as frequent nurse contacts and meals on wheels service usage, has implications on public policy. This implication may be more pronounced for public officials in developing countries. For example, China is also facing quickened population ageing. However, the traditional social welfare system cannot meet the care needs resulting from the rapidly

1  
2  
3 increased number of older people. The government has just recognized the importance of  
4 community services and is prioritising fostering the development of community services[30].  
5 Interestingly, in spite of the differences in social and cultural contexts, the specific services  
6 that the Chinese government focuses on are day care, dining rooms or other centralized meal  
7 delivery services, echoing the community services in western countries[31]. Although the  
8 public official has been long aware that chronic diseases, such as physical and cognitive  
9 impairments, are strong predictors for community care services, loneliness as a risk factor has  
10 been neglected. Findings from the current study add new evidence, that is, loneliness also  
11 contributes to the great needs for community care services to public. Despite the strong  
12 associations between loneliness and increased use of GP and community-based services, it is  
13 possible that lonely individuals have less knowledge about appropriate access to health and  
14 social care services or do not have the means to access them than non-lonely individuals.  
15 Given the robust link between loneliness and health outcomes reported in previous studies,  
16 individuals who are lonely may be at higher risk of health decline, and consequently are  
17 likely to have greater need of health services. However, in the current analysis, health  
18 conditions were adjusted for, implying that there might be other mechanisms underlying the  
19 association between loneliness and health and social care services usage. This again  
20 emphasises the importance of developing services that are sensitive to loneliness.  
21  
22  
23  
24

25 In conclusion, loneliness was found to be associated with frequent GP visits, community  
26 nurse contacts and meals on wheels service usage, independently of participants' health  
27 problems. As population ageing is happening across the world, it is urgent to realize the  
28 significance of loneliness on health service and social care demands. Moreover, evidence on  
29 interventions to prevent and reduce loneliness do not show promising results[32]. Future  
30 research is required to examine risk factors for loneliness in order to develop effective  
31 interventions that target on loneliness alleviation.  
32  
33  
34  
35  
36  
37  
38  
39  
40  
41  
42  
43  
44  
45  
46  
47  
48  
49  
50  
51  
52  
53  
54  
55  
56  
57  
58  
59  
60

## References

1. Dykstra PA. Older adult loneliness: myths and realities. *European journal of ageing* 2009;6(2):91.
2. Nolen-Hoeksema S, Ahrens C. Age differences and similarities in the correlates of depressive symptoms. *Psychology and aging*. 2002 Mar;17(1):116.
3. O'lunaigh C, O'connell H, Chin A-V, et al. Loneliness and cognition in older people: the Dublin Healthy Ageing study. *Ageing & mental health* 2012;16(3):347-52.
4. Wilson RS, Krueger KR, Arnold SE, et al. Loneliness and risk of Alzheimer disease. *Archives of general psychiatry* 2007;64(2):234-40.
5. Hawkley LC, Thisted RA, Masi CM, et al. Loneliness predicts increased blood pressure: 5-year cross-lagged analyses in middle-aged and older adults. *Psychology and aging* 2010;25(1):132.
6. Keysor JJ. Does late-life physical activity or exercise prevent or minimize disablement?: a critical review of the scientific evidence. *American journal of preventive medicine*. 2003 Oct 1;25(3):129-36.
7. Luo Y, Hawkley LC, Waite LJ, Cacioppo JT. Loneliness, health, and mortality in old age: a national longitudinal study. *Social science & medicine*. 2012 Mar 31;74(6):907-14.
8. Kurina LM, Knutson KL, Hawkley LC, et al. Loneliness is associated with sleep fragmentation in a communal society. *Sleep* 2011;34(11):1519-26.
9. Holt-Lunstad J, Smith TB, Baker M, et al. Loneliness and social isolation as risk factors for mortality: a meta-analytic review. *Perspectives on Psychological Science* 2015;10(2):227-37.
10. Gerst-Emerson K, Jayawardhana J. Loneliness as a Public Health Issue: The Impact of Loneliness on Health Care Utilization Among Older Adults. *American Journal of Public Health* 2015;105(5):1013-19. doi: 10.2105/AJPH.2014.302427
11. Newall N, McArthur J, Menec VH. A longitudinal examination of social participation, loneliness, and use of physician and hospital services. *Journal of aging and health* 2015;27(3):500-18.
12. Wenger GC, Burholt V. Changes in levels of social isolation and loneliness among older people in a rural area: A twenty-year longitudinal study. *Canadian Journal on Aging/la revue canadienne du vieillissement* 2004;23(2):115-27.
13. Victor CR, Bowling A. A longitudinal analysis of loneliness among older people in Great Britain. *The Journal of psychology* 2012;146(3):313-31.
14. Brittain K, Kingston A, Davies K, et al. An investigation into the patterns of loneliness and loss in the oldest old-Newcastle 85+ study. *Ageing & Society* 2017;37(1):39-62.
15. Fleming J, Zhao E, O'connor DW, et al. Cohort profile: the Cambridge City over-75s Cohort (CC75C). *International journal of epidemiology* 2007;36(1):40-46.
16. Victor C, Grenade L, Boldy D. Measuring loneliness in later life: a comparison of differing measures. *Reviews in Clinical Gerontology* 2005;15(1):63-70.
17. Roth M, Tym E, Mountjoy C, et al. CAMDEX. A standardised instrument for the diagnosis of mental disorder in the elderly with special reference to the early detection of dementia. *The British journal of psychiatry* 1986;149(6):698-709.
18. Lawton MP, Brody EM. Assessment of older people: self-maintaining and instrumental activities of daily living. *The gerontologist* 1969;9(3\_Part\_1):179-86.
19. Kurland BF, Heagerty PJ. Directly parameterized regression conditioning on being alive: analysis of longitudinal data truncated by deaths. *Biostatistics* 2005;6(2):241-58.
20. Jones M, Mishra GD, Dobson A. Analytical results in longitudinal studies depended on target of inference and assumed mechanism of attrition. *J Clin Epidemiol*

- 2015;68(10):1165-75. doi: 10.1016/j.jclinepi.2015.03.011 [published Online First: 2015/04/30]
21. Karazsia BT, Van Dulmen MH. Regression models for count data: Illustrations using longitudinal predictors of childhood injury. *Journal of pediatric psychology* 2008;33(10):1076-84.
  22. Robins JM, Rotnitzky A, Zhao LP. Analysis of semiparametric regression models for repeated outcomes in the presence of missing data. *Journal of the american statistical association* 1995;90(429):106-21.
  23. Dufouil C, Brayne C, Clayton D. Analysis of longitudinal studies with death and drop-out: a case study. *Statistics in medicine* 2004;23(14):2215-26.
  24. Kurland BF, Johnson LL, Egleston BL, et al. Longitudinal Data with Follow-up Truncated by Death: Match the Analysis Method to Research Aims. *Statistical science : a review journal of the Institute of Mathematical Statistics* 2009;24(2):211. doi: 10.1214/09-STS293
  25. Ellaway A, Wood S, Macintyre S. Someone to talk to? The role of loneliness as a factor in the frequency of GP consultations. *Br J Gen Pract* 1999;49(442):363-67.
  26. Cooper C. The Campaign to End Loneliness Surveyed more than 1,000 family doctors. *Independent* 2013 Nov; <https://www.independent.co.uk/life-style/health-and-families/health-news/charity-claims-loneliness-is-the-reason-one-in-10-visit-their-gp-8940392.html> (accessed 5 May 2018).
  27. Thomas KS, Akobundu U, Dosa D. More than a meal? A randomized control trial comparing the effects of home-delivered meals programs on participants' feelings of loneliness. *Journals of Gerontology Series B: Psychological Sciences and Social Sciences* 2015;71(6):1049-58.
  28. van der Zwet J, Koelewijn-van Loon MS, van den Akker M. Lonely patients in general practice: a call for revealing GPs' emotions? A qualitative study. *Family Practice* 2009;26(6):501-09. doi: 10.1093/fampra/cmp059
  29. BBC World Hacks. The town with a plan to end loneliness.2018.
  30. Zhou J, Walker A. The need for community care among older people in China. *Ageing & Society* 2016;36(6):1312-32.
  31. Tian, Q. Community care for the elderly: comparative study based on welfare pluralism. Doctoral dissertation, 2010.
  32. Cattan M, White M, Bond J, et al. Preventing social isolation and loneliness among older people: a systematic review of health promotion interventions. *Ageing & Society* 2005;25(1):41-67.

**Acknowledgements:** The authors gratefully acknowledge the contribution of previous investigators, past research team members, and staff in collaborating general practices and care homes, as well as the study respondents, their families and friends without whose help none of this research would be possible.

**Contributors:** HW proposed the research idea and conducted the analysis, as well as drafted the manuscript. CB critically reviewed the draft of this manuscript and provided input into analysis. EZ, JF, TD and K-TK provided feedback. JF and TD edited versions of the manuscript. All authors agreed to the submitted version of the paper.

**Funding:** The first author researcher received no specific grant from any funding agency in the public, commercial or not-for-profit sectors. We thank all the past CC75C sponsors for financial support spanning the decades since the Medical Research Council enabled the first follow-up survey (see study website for full list of project grants:

1  
2  
3 <http://www.cc75c.group.cam.ac.uk/background/grants/>), most recently the Abbeyfield  
4 Research Foundation and the BMA Foundation for Medical Research Dawkins and Strutt  
5 Grant. CC75C was a member study of the National Institute for Health Research funded  
6 Collaboration for Leadership in Applied Health Research & Care (CLAHRC) for  
7 Cambridgeshire and Peterborough. No funder sponsor played any role in the study design; in  
8 the collection, analysis, and interpretation of data; or in the writing of the report and the  
9 decision to submit the article for publication. All researchers were independent from funders.  
10  
11

12 **Competing interests:** None declared.  
13

14 **Patient consent:** Obtained.  
15

16  
17 **Ethics approval:** The study is approved by the East of England - Cambridge Central  
18 Research Ethics Committee, approval number 05/ Q0108/308.  
19

20 **Data sharing statement:** No additional data available.  
21

22  
23 Figure 1. Overview of participation for current analysis  
24

25 Figure 2. Overview of statistical models  
26  
27  
28  
29  
30  
31  
32  
33  
34  
35  
36  
37  
38  
39  
40  
41  
42  
43  
44  
45  
46  
47  
48  
49  
50  
51  
52  
53  
54  
55  
56  
57  
58  
59  
60



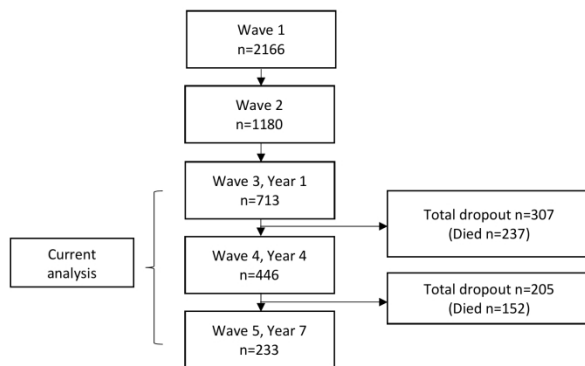

Figure 1. Overview of participation for current analysis

Figure 1 Overview of participation

209x297mm (300 x 300 DPI)

1  
2  
3  
4  
5  
6  
7  
8  
9  
10  
11  
12  
13  
14  
15  
16  
17  
18  
19  
20  
21  
22  
23  
24  
25  
26  
27  
28  
29  
30  
31  
32  
33  
34  
35  
36  
37  
38  
39  
40  
41  
42  
43  
44  
45  
46  
47  
48  
49  
50  
51  
52  
53  
54  
55  
56  
57  
58  
59  
60

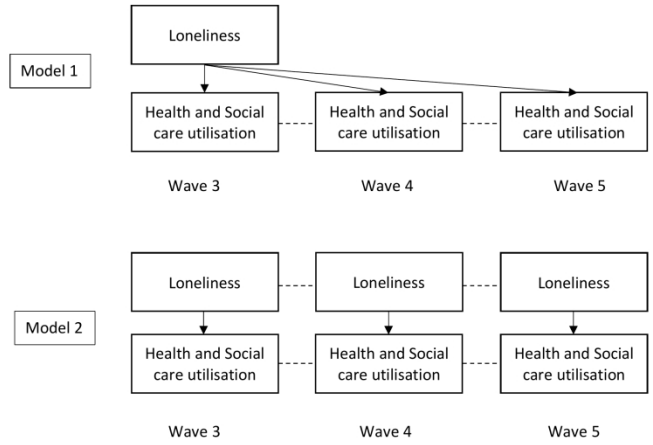

Figure 2. Overview of statistical models

Figure 2 Overview of statistical models

209x297mm (300 x 300 DPI)

## STROBE statement checklist

This manuscript was reported according to STROBE statement checklist. The corresponding answer to each item was labelled in Yellow. The answer indicated the page number in the main document against each criterion.

|                           | Item No | Recommendation                                                                                                                                                                                                                                                                                                                                                                                                                                                                                                                                                                                                                                                                                   |
|---------------------------|---------|--------------------------------------------------------------------------------------------------------------------------------------------------------------------------------------------------------------------------------------------------------------------------------------------------------------------------------------------------------------------------------------------------------------------------------------------------------------------------------------------------------------------------------------------------------------------------------------------------------------------------------------------------------------------------------------------------|
| <b>Title and abstract</b> | 1       | (a) Indicate the study's design with a commonly used term in the title or the abstract                                                                                                                                                                                                                                                                                                                                                                                                                                                                                                                                                                                                           |
| <b>P. 1-2</b>             |         | (b) Provide in the abstract an informative and balanced summary of what was done and what was found                                                                                                                                                                                                                                                                                                                                                                                                                                                                                                                                                                                              |
| <b>Introduction P. 3</b>  |         |                                                                                                                                                                                                                                                                                                                                                                                                                                                                                                                                                                                                                                                                                                  |
| Background/rationale      | 2       | Explain the scientific background and rationale for the investigation being reported                                                                                                                                                                                                                                                                                                                                                                                                                                                                                                                                                                                                             |
| Objectives                | 3       | State specific objectives, including any prespecified hypotheses                                                                                                                                                                                                                                                                                                                                                                                                                                                                                                                                                                                                                                 |
| <b>Methods P. 3-6</b>     |         |                                                                                                                                                                                                                                                                                                                                                                                                                                                                                                                                                                                                                                                                                                  |
| Study design              | 4       | Present key elements of study design early in the paper                                                                                                                                                                                                                                                                                                                                                                                                                                                                                                                                                                                                                                          |
| Setting                   | 5       | Describe the setting, locations, and relevant dates, including periods of recruitment, exposure, follow-up, and data collection                                                                                                                                                                                                                                                                                                                                                                                                                                                                                                                                                                  |
| Participants              | 6       | (a) <i>Cohort study</i> —Give the eligibility criteria, and the sources and methods of selection of participants. Describe methods of follow-up<br><i>Case-control study</i> —Give the eligibility criteria, and the sources and methods of case ascertainment and control selection. Give the rationale for the choice of cases and controls<br><i>Cross-sectional study</i> —Give the eligibility criteria, and the sources and methods of selection of participants<br>(b) <i>Cohort study</i> —For matched studies, give matching criteria and number of exposed and unexposed<br><i>Case-control study</i> —For matched studies, give matching criteria and the number of controls per case |
| Variables                 | 7       | Clearly define all outcomes, exposures, predictors, potential confounders, and effect modifiers. Give diagnostic criteria, if applicable                                                                                                                                                                                                                                                                                                                                                                                                                                                                                                                                                         |
| Data sources/ measurement | 8*      | For each variable of interest, give sources of data and details of methods of assessment (measurement). Describe comparability of assessment methods if there is more than one group                                                                                                                                                                                                                                                                                                                                                                                                                                                                                                             |
| Bias                      | 9       | Describe any efforts to address potential sources of bias                                                                                                                                                                                                                                                                                                                                                                                                                                                                                                                                                                                                                                        |
| Study size                | 10      | Explain how the study size was arrived at                                                                                                                                                                                                                                                                                                                                                                                                                                                                                                                                                                                                                                                        |
| Quantitative variables    | 11      | Explain how quantitative variables were handled in the analyses. If applicable, describe which groupings were chosen and why                                                                                                                                                                                                                                                                                                                                                                                                                                                                                                                                                                     |
| Statistical methods       | 12      | (a) Describe all statistical methods, including those used to control for confounding<br>(b) Describe any methods used to examine subgroups and interactions<br>(c) Explain how missing data were addressed<br>(d) <i>Cohort study</i> —If applicable, explain how loss to follow-up was addressed<br><i>Case-control study</i> —If applicable, explain how matching of cases and controls was addressed<br><i>Cross-sectional study</i> —If applicable, describe analytical methods taking account of sampling strategy<br>(e) Describe any sensitivity analyses                                                                                                                                |

Continued on next page

**Results**

|                          |                 |                                                                                                                                                                                                                                                                                                                                                                                                               |
|--------------------------|-----------------|---------------------------------------------------------------------------------------------------------------------------------------------------------------------------------------------------------------------------------------------------------------------------------------------------------------------------------------------------------------------------------------------------------------|
| Participants             | 13*             | (a) Report numbers of individuals at each stage of study—eg numbers potentially eligible, examined for eligibility, confirmed eligible, included in the study, completing follow-up, and analysed<br>(b) Give reasons for non-participation at each stage<br>(c) Consider use of a flow diagram                                                                                                               |
|                          |                 | <b>P. 6</b>                                                                                                                                                                                                                                                                                                                                                                                                   |
| Descriptive data         | 14*             | (a) Give characteristics of study participants (eg demographic, clinical, social) and information on exposures and potential confounders<br>(b) Indicate number of participants with missing data for each variable of interest<br>(c) <i>Cohort study</i> —Summarise follow-up time (eg, average and total amount)                                                                                           |
|                          |                 | <b>P. 6-8</b>                                                                                                                                                                                                                                                                                                                                                                                                 |
| Outcome data             | 15*             | <i>Cohort study</i> —Report numbers of outcome events or summary measures over time<br><i>Case-control study</i> —Report numbers in each exposure category, or summary measures of exposure<br><i>Cross-sectional study</i> —Report numbers of outcome events or summary measures                                                                                                                             |
|                          |                 | <b>P. 8-9</b>                                                                                                                                                                                                                                                                                                                                                                                                 |
| Main results             | 16              | (a) Give unadjusted estimates and, if applicable, confounder-adjusted estimates and their precision (eg, 95% confidence interval). Make clear which confounders were adjusted for and why they were included<br>(b) Report category boundaries when continuous variables were categorized<br>(c) If relevant, consider translating estimates of relative risk into absolute risk for a meaningful time period |
|                          |                 | <b>P. 7-11</b>                                                                                                                                                                                                                                                                                                                                                                                                |
| Other analyses           | 17              | Report other analyses done—eg analyses of subgroups and interactions, and sensitivity analyses                                                                                                                                                                                                                                                                                                                |
|                          |                 |                                                                                                                                                                                                                                                                                                                                                                                                               |
| <b>Discussion</b>        | <b>P. 12-14</b> |                                                                                                                                                                                                                                                                                                                                                                                                               |
| Key results              | 18              | Summarise key results with reference to study objectives                                                                                                                                                                                                                                                                                                                                                      |
| Limitations              | 19              | Discuss limitations of the study, taking into account sources of potential bias or imprecision. Discuss both direction and magnitude of any potential bias                                                                                                                                                                                                                                                    |
| Interpretation           | 20              | Give a cautious overall interpretation of results considering objectives, limitations, multiplicity of analyses, results from similar studies, and other relevant evidence                                                                                                                                                                                                                                    |
| Generalisability         | 21              | Discuss the generalisability (external validity) of the study results                                                                                                                                                                                                                                                                                                                                         |
|                          |                 |                                                                                                                                                                                                                                                                                                                                                                                                               |
| <b>Other information</b> | <b>P. 16</b>    |                                                                                                                                                                                                                                                                                                                                                                                                               |
| Funding                  | 22              | Give the source of funding and the role of the funders for the present study and, if applicable, for the original study on which the present article is based                                                                                                                                                                                                                                                 |

# BMJ Open

## Is loneliness associated with increased health and social care utilisation in the oldest old? Findings from a population-based longitudinal study

|                                 |                                                                                                                                                                                                                                                                                                                                                                                                                                                                                                 |
|---------------------------------|-------------------------------------------------------------------------------------------------------------------------------------------------------------------------------------------------------------------------------------------------------------------------------------------------------------------------------------------------------------------------------------------------------------------------------------------------------------------------------------------------|
| Journal:                        | <i>BMJ Open</i>                                                                                                                                                                                                                                                                                                                                                                                                                                                                                 |
| Manuscript ID                   | bmjopen-2018-024645.R2                                                                                                                                                                                                                                                                                                                                                                                                                                                                          |
| Article Type:                   | Research                                                                                                                                                                                                                                                                                                                                                                                                                                                                                        |
| Date Submitted by the Author:   | 30-Mar-2019                                                                                                                                                                                                                                                                                                                                                                                                                                                                                     |
| Complete List of Authors:       | Wang, Hanyuying; Institute of Public Health, University of Cambridge<br>Zhao, Emily<br>Fleming, Jane; University of Cambridge, Cambridge Institute of Public Health; University of Cambridge, Department of Public Health and Primary Care<br>Denning, Tom; University of Nottingham, Division of Psychiatry & Applied Psychology<br>Khaw, Kay-Tee; University of Cambridge, Department of Public Health and Primary Care<br>Brayne, Carol; University of Cambridge, Institute of Public Health |
| <b>Primary Subject Heading</b>: | Public health                                                                                                                                                                                                                                                                                                                                                                                                                                                                                   |
| Secondary Subject Heading:      | Health services research                                                                                                                                                                                                                                                                                                                                                                                                                                                                        |
| Keywords:                       | Loneliness, Health service, Social care, The oldest old                                                                                                                                                                                                                                                                                                                                                                                                                                         |
|                                 |                                                                                                                                                                                                                                                                                                                                                                                                                                                                                                 |

SCHOLARONE™  
Manuscripts

1  
2  
3 **Is loneliness associated with increased health and social care utilisation in the oldest**  
4 **old? Findings from a population-based longitudinal study**  
5  
6  
7

8  
9 Hanyuying Wang<sup>1</sup>, Emily Zhao<sup>1</sup>, Jane Fleming<sup>1</sup>, Tom Dening<sup>2</sup>, Kay-Tee Khaw<sup>3</sup>, Carol  
10 Brayne<sup>1,3</sup> on behalf of the CC75C study collaboration  
11

- 12  
13 1. Institute of Public Health, University of Cambridge, Cambridge, UK  
14 2. Division of Psychiatry & Applied Psychology, School of Medicine, University of  
15 Nottingham, Nottingham, UK  
16 3. Department of Public Health and Primary Care, Cambridge, UK  
17  
18  
19  
20  
21

22 Corresponding author

23 Hanyuying Wang

24 Institute of Public Health

25 Forvie Site, Robinson Way

26 Cambridge, CB2 0SR

27 Email: [hw448@medschl.cam.ac.uk](mailto:hw448@medschl.cam.ac.uk)

28 Tel: 07843853914  
29  
30  
31  
32  
33

34 Word count: 3592  
35  
36  
37  
38  
39  
40  
41  
42  
43  
44  
45  
46  
47  
48  
49  
50  
51  
52  
53  
54  
55  
56  
57  
58  
59  
60

## Abstract

**Objectives** The present study aimed to examine the impact of loneliness on health and social care service use in the oldest old over a 7-year follow-up.

**Design** Prospective study.

**Setting** UK population-based cohort

**Participants** 713 people aged 80 years or older were interviewed at wave 3 of the Cambridge City over-75s Cohort Study (CC75C). Of these, 665 provided data on loneliness. During 7 years' follow-up 480 participants left the study, of which 389 due to death. 162 still in the study answered the loneliness question.

**Main outcome measure** Use of health and social care services, assessed at each wave from wave 3 to wave 5

**Results** At wave 3, of 665 participants who had data on loneliness, about 60% did not feel lonely, 16% felt slightly lonely and 25% felt lonely. Being slightly lonely at wave 3 was associated with a shorter time since last seeing a GP ( $\beta=-0.5$ , 95%CI: -0.8, -0.2); When examining the association between time-varying loneliness and health and social care usage, being lonely was associated with three times greater likelihood of having contact with community nurses and using meals on wheels services (community nurse contact: IRR=3.4, 95%CI: 1.4, 8.7; meals on wheels service use: IRR=2.5, 95%CI: 1.1, 5.6). No associations between loneliness and other health and social care services use were found.

**Conclusion** Loneliness was a significant risk factor for certain types of health and social care utilisations, independently of participants' health conditions, in the oldest old. Study findings have several implications, including the need for awareness-raising and prevention of loneliness to be priorities for public health policy and practice.

**Keywords** Loneliness, health service, social care, the oldest old

### Strengths and limitations of this study

- Study participants were from one of the longest-run prospective cohort studies of the very old; a wide range of important confounders were adjusted for.
- Loneliness and health and social care utilisation were measured repeatedly during follow-up, so associations between time-varying loneliness and health and social care usage can be examined.
- Dropout and missing data were adjusted for by using inverse probability weighting
- Findings from the current study might not generalise to all older populations because the CC75C recruited men and women living in only one city.

## Introduction

Loneliness is an unpleasant feeling resulting from the mismatch between individuals' obtained social relationships and desired ones. It is commonly experienced by older people. Previous studies have reported that at any given time, about one quarter of individuals aged 65-79 reported feeling lonely, and the percentage feeling loneliness increased to about 40% among individuals aged 80 and over[1]. There have been consistent reports both from longitudinal and cross-sectional studies on the association of loneliness with mental health[2], cognitive decline[3-4], poor physical health[5-7] and mortality[8-9]. Those on mental health have been consistent across age groups studied.

Because of the strong relationships between loneliness and health outcomes, and the associations between adverse health and use of health and social services, there has been much interest in exploring the role of loneliness as an independent risk factor for health service and social care utilisation. However, findings from previous studies have been inconsistent. Using data from the Health and Retirement Study (HRS), researchers investigated whether loneliness was related to increased frequency of physician visits and hospital admission over a 4-year follow-up, and found that loneliness was significantly associated with physician visits but not hospital admission[10]. However, a longitudinal study following up Canadian community-dwelling elders for 2.5 years did not find any associations between loneliness and physician visits or hospitalization[11]. The heterogeneity in existing evidence is likely to be due to the differences in study sample, selection of covariates, length of follow-up time, and the measures of loneliness. On the other hand, most studies focused on the general older population (aged 65 and over) with the oldest old (aged 80 and over) under-represented. Compared to the young old, the oldest old are at greater risk of losing family members and friends, experiencing physical or mental health decline, and therefore, are more vulnerable to changes in both loneliness and health, consequently, their demand for health and social care services is greater. Moreover, to the best of our knowledge, only one longitudinal study examined the impact of loneliness on health and social care service use by using repeated assessments (loneliness was measured at two time points in that study) over time[10]. However, with only two measures, researchers were not able to capture the fluctuating nature of loneliness[12-14], therefore, the complicated association between time-varying loneliness and health and social care utilisation could not be examined.

The current study aims to address two main questions. First, whether loneliness at baseline is associated with health and social care service use, and second, when loneliness was assessed at different times, whether there are relationships between time-varying loneliness and health and social care service use.

## Method

### Study sample

Participants were from wave 3 to wave 5 of the Cambridge City over-75s Cohort Study (CC75C), a population-based prospective cohort study of individuals aged 75 or older. The detailed description of this study can be found elsewhere[15]. Briefly, in 1985, 2610 men and women aged 75 and over from geographically and socially representative general practices in Cambridge were recruited with a high response rate (95% in six of the seven general practices), of whom 2166 were at the initial wave of this study (444 were excluded due to different recruitment or participation in a concurrent intervention study). This group of



1  
2  
3 individuals was then surveyed by trained lay interviewers using a similar questionnaire every  
4 3 or 4 years, and in total, 10 waves of data have been collected. Written informed consent  
5 was obtained from all participants (or from their proxy informants for those who were frail).  
6 This study was approved before each survey wave by Cambridge Research Ethics  
7 Committee. Patient and public involvement was not considered in the early 1980s at the  
8 design stage of the cohort study which collected the data in these analyses. Participants and  
9 their families were kept informed of study findings with regular newsletters. Figure 1  
10 describes the overview of participation for current analysis.  
11  
12

### 13 **Patient and Public Involvement**

14  
15  
16 Patient and public involvement was not considered in the early 1980s at the design stage of  
17 the cohort study which collected the data in these analyses. Participants and their families  
18 were kept informed of study findings with regular newsletters.  
19

### 20 **Measures**

#### 21 **Health and social care utilisation**

22  
23  
24  
25 The health and social care utilisation included in this study consisted of community service  
26 contacts, hospital visits and general practice (GP) visits. The community service contact  
27 comprised the number of self-reported contacts with a home help, community nurse, meals  
28 on wheels or day centre in the past week. For each service more than six contacts a week  
29 were coded as six. Hospital visits was assessed by asking participants how many times they  
30 had been in hospital in the past year, coded 0, 1 or 2 with this maximum score reflecting two  
31 or more, due to the small frequency of more frequent visits. As an indicator of frequency of  
32 GP visits participants were asked how long it had been since they last saw a GP; answers  
33 were recorded in months up to a maximum of 98. In analyses, community service contact and  
34 hospital visit responses were treated as count variables, and time since last GP visit was  
35 treated as a continuous variable.  
36  
37

#### 38 **Loneliness**

39  
40  
41 At each wave, loneliness was assessed by a single question 'Do you feel lonely?', with  
42 response options 'not at all lonely', 'slightly lonely', 'lonely', and 'very lonely'. In analyses,  
43 due to the small number of participants who reported feeling lonely or very lonely, these two  
44 categories were then combined as one category: 'lonely'. Therefore, loneliness was divided  
45 into three levels here: 'not lonely' (indicates 'not at all lonely'), 'slightly lonely' and 'lonely'  
46 (indicates 'lonely' and 'very lonely'). The single-item scale was used widely in European  
47 studies, and it has been reported that it was adopted well by the older population[16].  
48  
49

#### 50 **Covariates**

51  
52  
53 The covariates included in analyses were demographics and variables associated with  
54 loneliness and health outcomes. They were age (80-84, 85-89, and 90+), sex (men as the  
55 reference), physical impairments (measured through a series of self-reported or proxy-  
56 reported conditions, including poor vision, poor hearing, arthritis/rheumatism, back pain,  
57 chest pain, shortness of breath, marked weakness in arms or leg, unsteady on feet, tendency  
58 to fall, trouble with nerves and others; the total score was the sum of score for each condition  
59 and categorised into low, moderate and severe levels based on 25%, 50% and 75%  
60

percentiles), number of chronic diseases (included self-reported doctor-diagnosed angina, heart attack, circulation problems in legs, high blood pressure, chronic bronchitis, stroke, sudden weakness or difficulty with speech, memory or vision, sugar diabetes, thyroid problems, severe headaches or migraine and others; categorised into 0-2 or  $\geq 3$  conditions), depression (measured by a series of questions derived from the Cambridge Examination for Mental Disorders in the Elderly (CAMDEX)[17], the total score ranged from 0-10, and depression was defined if score  $\geq 6$ ), physical functioning (assessed by participants' responses to questions on activities of daily living (ADL), and categorised into no disability, instrumental ADL (IADL) disability only or disability in both basic ADLs & IADLs)[18], and cognition (assessed by Mini-Mental Status Examination (MMSE), score ranged from 0-30). All covariates were measured at wave 3.

### Statistical analysis

The current analyses included participants who had provided data on loneliness at wave 3. Loneliness non-response at wave 3 was adjusted by inverse probability weighting. The calculation was modelled on variables associated with loneliness missingness. The characteristics of the sample were described according to their wave 3 loneliness level after adjusting for non-response.

To examine the association between loneliness and health and social care utilisation over a 7-year follow-up, Generalized Estimating Equations (GEE) with independent variance matrix and negative binomial family were fitted to model count outcomes, and GEE with independent variance matrix with Gamma family was used to model the continuous outcome. The use of GEE with independent variance matrix is expected to ensure the target for inference is based on the mortal cohort (living population at each wave)[19-20]. The use of negative binomial modelling for count responses can help with overdispersion control in the data[21]. The choice of Gamma family for modelling the continuous outcome was because the distribution of continuous variable "time since last visiting a GP" was not normally distributed and fits into one of the Gamma distribution shapes, a Gamma distribution was therefore assumed. Two types of associations were tested. First, the association between baseline loneliness (measured at wave 3) and health and social care usage (repeated measurements at waves 3, 4, 5) was explored, and then the association between loneliness as a time-varying predictor (measured at wave 3, 4, 5) and health and social care usage was investigated (again, repeated measurements at wave 3, 4, 5) (Figure 2). In both analyses, time was entered (i.e.  $t=1, 2, 3$ ) to reflect the order of the three repeated measurements. Both analyses were adjusted for covaries.

To adjust for dropout during follow-up, the inverse probability weighting was calculated based on probability of staying in the study on the condition of responding to the previous wave and being alive at the current wave[19,22-24]. As participants in this study were followed up from wave 3 onwards, cross-sectional weight adjusting for dropout before wave 3 was calculated. Taken together, a final weight was calculated by multiplying wave 3 cross-sectional weight, weight adjusting for loneliness non-response at wave 3 and longitudinal weight, and implemented in longitudinal analyses.

Because several covariates included in the analyses were health-related, such as physical impairment, physical functioning and number of chronic diseases; despite that they were collected in distinctive ways, a sensitivity analysis was performed to test the impact of

1  
2  
3 loneliness on health and social service use adjusting only for physical functioning. The  
4 results of the sensitivity analysis were listed in table S1 and S2 (Supplementary Information).  
5

6 All analyses were implemented in Stata v13.1 (StataCorp LP, College Station, TX, USA). A  
7 p-value <0.05 was considered statistically significant.  
8  
9

## 10 11 **Results**

12  
13 During the 7-year follow-up n=480/713 (67%) participants dropped out from study, and  
14 n=389 out of 480 (81%) dropped out due to mortality (Figure 1). At wave 3, n=393  
15 participants reported they were not lonely and, of those reporting any degree of loneliness,  
16 n=107 and n=165 said they felt “slightly lonely” and “lonely”, respectively (Table 1). For  
17 48/713 (7%) participants with no valid response to the loneliness question at wave 3, n=35  
18 were proxy informant interviews. Over half of participants were aged at least 85 years old,  
19 most were women, had a moderate level of physical impairment, had less than 3 chronic  
20 diseases, and were not depressed. About 40% of participants did not have any disabilities,  
21 while approximately 35% suffered from both IADL and ADL disabilities. The average  
22 MMSE score was 23.  
23  
24  
25

26 Table 2 shows the weighted percentage of participants in each category by loneliness level  
27 measured at wave 3. The prevalence of feeling lonely was high among women and  
28 individuals who had a moderate to high level of physical impairment, were depressed and had  
29 disabilities in IADL & ADL (Table 2).  
30  
31  
32  
33  
34  
35  
36  
37  
38  
39  
40  
41  
42  
43  
44  
45  
46  
47  
48  
49  
50  
51  
52  
53  
54  
55  
56  
57  
58  
59  
60

Table 1 Participants' characteristics at wave 3

| Characteristics                   | No. of Participants | % of Participants |
|-----------------------------------|---------------------|-------------------|
|                                   | 665                 | 100               |
| <b>Loneliness</b>                 |                     |                   |
| Not lonely                        | 393                 | 59                |
| Slightly lonely                   | 107                 | 16                |
| Lonely                            | 165                 | 25                |
| <b>Age</b>                        |                     |                   |
| 80-84                             | 304                 | 46                |
| 85-89                             | 267                 | 40                |
| 90+                               | 94                  | 14                |
| <b>Sex</b>                        |                     |                   |
| Men                               | 207                 | 31                |
| Women                             | 458                 | 69                |
| <b>Physical impairment</b>        |                     |                   |
| Low                               | 227                 | 35                |
| Moderate                          | 292                 | 45                |
| High                              | 130                 | 20                |
| <b>Number of chronic diseases</b> |                     |                   |
| 0-2                               | 409                 | 64                |
| >=3                               | 228                 | 36                |
| <b>Depression</b>                 |                     |                   |
| No                                | 538                 | 87                |
| Yes                               | 78                  | 13                |
| <b>Physical functioning</b>       |                     |                   |
| No disability                     | 249                 | 38                |
| IADL disability only              | 176                 | 27                |
| IADL & ADL disability             | 231                 | 35                |
| <b>Cognition</b> *                | 23 (6) <sup>+</sup> | -                 |

Note: \* cognition was measured as a continuous variable ranging from 1-30 with higher score indicating better cognition. <sup>+</sup>: mean±SD. Because of the missing data, the sum of column data for certain variables may not equal to 665.

Table 2. The distribution of baseline characteristics by loneliness level (weight<sup>‡</sup> applied)

| Characteristics                   | Not lonely | Slightly lonely | Lonely | p-value |
|-----------------------------------|------------|-----------------|--------|---------|
|                                   | 59%        | 16%             | 25%    |         |
| <b>Age</b>                        |            |                 |        |         |
| 80-84                             | 63%        | 16%             | 21%    | 0.26    |
| 85-89                             | 55%        | 18%             | 27%    |         |
| 90+                               | 57%        | 13%             | 30%    |         |
| <b>Sex</b>                        |            |                 |        |         |
| Men                               | 71%        | 12%             | 17%    | <.001   |
| Women                             | 53%        | 18%             | 29%    |         |
| <b>Physical impairment</b>        |            |                 |        |         |
| Low                               | 76%        | 12%             | 12%    | <.001   |
| Moderate                          | 59%        | 15%             | 26%    |         |
| High                              | 37%        | 23%             | 40%    |         |
| <b>Number of chronic diseases</b> |            |                 |        |         |
| 0-2                               | 63%        | 16%             | 21%    | 0.13    |
| ≥ 3                               | 56%        | 16%             | 28%    |         |
| <b>Depression</b>                 |            |                 |        |         |
| No                                | 65%        | 15%             | 20%    | <.001   |
| Yes                               | 25%        | 24%             | 51%    |         |
| <b>Physical functioning</b>       |            |                 |        |         |
| No disability                     | 59%        | 18%             | 23%    | <.05    |
| IADL disability only              | 70%        | 12%             | 18%    |         |
| IADL & ADL disabilities           | 54%        | 17%             | 29%    |         |
| <b>Cognition (mean±SD)</b>        |            |                 |        |         |
| MMSE                              | 22 (6)     | 22 (6)          | 21 (7) | 0.7     |

Note: <sup>‡</sup> weight: the product of wave 3 cross-sectional weight and weight adjusted for non-response at wave 3.

In terms of associations between baseline loneliness and health and social care utilisation, the only significant association was that feeling slightly lonely was positively associated with GP visits after adjusting for demographic characteristics and health problems (Table 3). Neither feeling lonely nor feeling slightly lonely were found to be related to home help use, community nurse contacts, meals on wheels service use, day centre or hospital visits. Results also indicated that moderate and high levels of physical impairment were significantly associated with home help use and with hospital visits. Having three or more chronic diseases was associated with community nurse contacts. Having disabilities in both IADL & ADL was related to increased frequency of day centre visits. On the other hand, depression was significantly and negatively associated with day centre visits. However, being depressed was associated with shorter time since last seeing a GP. Moreover, being female and having at least three chronic diseases was also associated with GP visits.

Table 3. Associations between baseline loneliness and health and social care utilisation

|                             | Home Help             | Community Nurse      | Meals on Wheels | Day centre            | Hospital visits      | Time since last saw a GP |
|-----------------------------|-----------------------|----------------------|-----------------|-----------------------|----------------------|--------------------------|
|                             | IRR (95% CI)          | IRR (95% CI)         | IRR (95% CI)    | IRR (95% CI)          | IRR (95% CI)         | Beta (95% CI)            |
| Time                        | 1.1 (0.4-2.8)         | 2.5 (0.9-6.9)        | 1.1 (0.4-2.8)   | 0.9 (0.3-2.6)         | 1.5 (0.7-3.0)        | 0.1 (-0.3, 0.6)          |
| <b>Loneliness (wave 3)</b>  |                       |                      |                 |                       |                      |                          |
| Slightly lonely             | 1.3 (0.5-3.6)         | 0.6 (0.2-2.2)        | 1.9 (0.8-4.9)   | 1.6 (0.5-5.0)         | 1.3 (0.8-2.1)        | <b>-0.5 (-0.8, -0.2)</b> |
| Lonely                      | 2.4 (0.8-7.3)         | 1.1 (0.5-2.5)        | 2.0 (0.9-4.5)   | 1.4 (0.3-5.3)         | 1.2 (0.8-1.9)        | -0.1 (-0.5, 0.3)         |
| <b>Age</b>                  |                       |                      |                 |                       |                      |                          |
| 85-89                       | 0.5 (0.2-1.1)         | 0.8 (0.4-1.9)        | 0.8 (0.4-1.7)   | 1.0 (0.4-2.3)         | 0.7 (0.5-1.1)        | 0.2 (-0.1, 0.5)          |
| 90+                         | 0.9 (0.2-3.9)         | 0.9 (0.3-2.6)        | 0.6 (0.1-3.6)   | 1.6 (0.1-19.9)        | 1.3 (0.6-2.9)        | 0.02 (-0.6, 0.7)         |
| <b>Sex</b>                  |                       |                      |                 |                       |                      |                          |
| Women                       | 1.3 (0.5-3.2)         | 0.7 (0.3-2.0)        | 0.8 (0.4-2.0)   | 1.4 (0.6-3.4)         | 0.7 (0.4-1.1)        | <b>-0.5 (-0.8, -0.1)</b> |
| <b>Physical impairments</b> |                       |                      |                 |                       |                      |                          |
| Moderate                    | <b>2.3 (0.96-5.4)</b> | 2.2 (0.9-5.1)        | 0.6 (0.2-1.5)   | 1.6 (0.4-5.8)         | 1.3 (0.8-2.1)        | -0.2 (-0.5, 0.2)         |
| High                        | <b>3.9 (1.5-10.6)</b> | 2.0 (0.8-5.1)        | 1.9 (0.8-4.6)   | 3.2 (0.7-13.6)        | <b>2.5 (1.4-4.6)</b> | -0.3 (-0.7, 0.1)         |
| <b>Health condition</b>     |                       |                      |                 |                       |                      |                          |
| ≥ 3                         | 1.5 (0.7-3.3)         | <b>2.4 (1.1-5.0)</b> | 1.2 (0.6-2.5)   | 2.1 (0.7-6.5)         | 1.1 (0.7-1.7)        | <b>-0.3 (-0.6, -0.1)</b> |
| <b>Depression</b>           |                       |                      |                 |                       |                      |                          |
| Yes                         | 0.6 (0.2-1.6)         | 0.6 (0.2-1.9)        | 0.5 (0.2-1.5)   | <b>0.3 (0.1-1.0)</b>  | 1.1 (0.5-2.2)        | <b>-0.4 (-0.8, -0.1)</b> |
| <b>Physical functioning</b> |                       |                      |                 |                       |                      |                          |
| IADL disability only        | 2.4 (0.9-6.4)         | 1.0 (0.3-3.2)        | 0.8 (0.3-2.6)   | 2.4 (0.9-6.3)         | 0.7 (0.4-1.2)        | -0.3 (-0.7, 0.1)         |
| IADL & ADL disabilities     | 2.3 (0.9-6.2)         | 1.6 (0.6-3.9)        | 1.5 (0.6-3.7)   | <b>2.9 (0.96-8.9)</b> | 1.0 (0.6-1.7)        | 0.1 (-0.2, 0.4)          |
| <b>Cognition</b>            | 0.9 (0.8-1.1)         | 1.0 (0.9-1.1)        | 0.9 (0.8-1.1)   | 1.0 (0.8-1.1)         | 1.0 (0.9-1.1)        | -0.05 (-0.1, 0.01)       |

Reference groups: not lonely, 80-84 years old, men, no physical impairments, 0-2 chronic diseases, not depressed, and not disabled.

IRR: incidence rate ratio.

Table 4. Association between time-varying loneliness and health and social care utilisation

|                             | Home Help              | Community Nurse       | Meals on Wheels       | Day centre             | Hospital visits         | Time since last saw a GP  |
|-----------------------------|------------------------|-----------------------|-----------------------|------------------------|-------------------------|---------------------------|
|                             | IRR (95% CI)           | IRR (95% CI)          | IRR (95% CI)          | IRR (95% CI)           | IRR (95% CI)            | Beta (95% CI)             |
| Time                        | 1.0 (0.4, 2.5)         | 2.3 (0.9, 5.8)        | 1.0 (0.4, 2.6)        | 1.4 (0.4, 4.9)         | 1.3 (0.7, 2.6)          | 0.1 (-0.3, 0.5)           |
| <b>Loneliness</b>           |                        |                       |                       |                        |                         |                           |
| Slightly lonely             | 1.2 (0.5, 2.9)         | 0.8 (0.3, 2.6)        | 1.6 (0.6, 3.8)        | 1.7 (0.5, 5.5)         | 1.4 (0.9, 2.1)          | -0.3 (-0.6, 0.1)          |
| Lonely                      | 2.0 (0.8, 4.9)         | <b>3.4 (1.4, 8.7)</b> | <b>2.5 (1.1, 5.6)</b> | 1.4 (0.4, 5.3)         | 1.5 (0.9, 2.4)          | -0.2 (-0.5, 0.1)          |
| <b>Age</b>                  |                        |                       |                       |                        |                         |                           |
| 85-89                       | 0.5 (0.2, 1.1)         | 0.8 (0.3, 1.9)        | 1.0 (0.5, 2.0)        | 1.0 (0.4, 2.5)         | 0.7 (0.5, 1.2)          | 0.2 (-0.1, 0.5)           |
| 90+                         | 0.9 (0.2, 4.4)         | 1.3 (0.4, 4.7)        | 0.6 (0.1, 5.9)        | 4.2 (0.3, 51.7)        | 1.0 (0.4, 2.7)          | 0.1 (-0.6, 0.7)           |
| <b>Sex</b>                  |                        |                       |                       |                        |                         |                           |
| Women                       | 1.2 (0.5, 3.1)         | 0.5 (0.2, 1.5)        | 0.8 (0.3, 1.9)        | 1.4 (0.5, 4.0)         | <b>0.6 (0.4, 1.002)</b> | <b>-0.5 (-0.9, -0.2)</b>  |
| <b>Physical impairments</b> |                        |                       |                       |                        |                         |                           |
| Moderate                    | 2.3 (0.9, 5.7)         | 1.9 (0.8, 4.5)        | 0.7 (0.2, 2.0)        | 4.0 (0.7, 23.4)        | 1.3 (0.8, 2.1)          | -0.1 (-0.5, 0.2)          |
| High                        | <b>4.1 (1.6, 10.8)</b> | 1.4 (0.4, 4.5)        | 1.9 (0.7, 5.3)        | <b>7.6 (1.2, 48.7)</b> | <b>2.3 (1.2, 4.4)</b>   | -0.3 (-0.7, 0.1)          |
| <b>Health condition</b>     |                        |                       |                       |                        |                         |                           |
| ≥3                          | 1.5 (0.7, 3.3)         | <b>2.6 (1.2, 5.5)</b> | 1.2 (0.6, 2.6)        | 2.3 (0.6, 8.7)         | 1.2 (0.8, 1.9)          | <b>-0.3 (-0.6, -0.1)</b>  |
| <b>Depression</b>           |                        |                       |                       |                        |                         |                           |
| Yes                         | 0.6 (0.2, 1.6)         | 0.5 (0.2, 1.5)        | 0.5 (0.2, 1.7)        | 0.3 (0.1, 1.1)         | 1.1 (0.5, 2.1)          | <b>-0.4 (-0.8, -0.03)</b> |
| <b>Physical functioning</b> |                        |                       |                       |                        |                         |                           |
| IADL disability only        | 2.1 (0.8, 5.6)         | 0.9 (0.3, 2.7)        | 0.8 (0.2, 2.6)        | 2.7 (0.9, 8.5)         | 0.7 (0.4, 1.3)          | -0.3 (-0.7, 0.1)          |
| IADL & ADL disabilities     | 2.3 (0.8, 6.3)         | 1.0 (0.4, 2.5)        | 1.5 (0.5, 4.5)        | 2.1 (0.7, 6.7)         | 1.0 (0.6, 1.7)          | 0.2 (-0.1, 0.5)           |
| <b>Cognition</b>            | 0.9 (0.8, 1.0)         | 0.9 (0.8, 1.0)        | 0.9 (0.8, 1.1)        | 1.1 (0.9, 1.2)         | 1.0 (0.9, 1.1)          | -0.05 (-0.1, 0.0003)      |

Reference groups: not lonely, 80-84 years old, men, no physical impairments, 0-2 chronic diseases, not depressed, and not disabled.

IRR: incidence rate ratio.

1  
2  
3 Table 4 presents the results of time-varying loneliness for health and social care usage.  
4 Individuals who felt lonely were three times more likely to contact the community nurse and  
5 use the meals on wheels service than non-lonely individuals, respectively. The other variables  
6 that were significantly associated with health and social care utilisation were similar to those  
7 in the analyses exploring the association between baseline loneliness and health and social  
8 care usage, except that the significance of the associations between depression, disabilities in  
9 IADL & ADL and day centre visits disappeared; instead, the high level of physical  
10 impairment was found to be significantly related to day centre visits.  
11  
12

13 The effect size of loneliness, either base-line loneliness or time-varying loneliness, on health  
14 and social care service use in sensitivity analyses were similar with that from the main  
15 analyses.  
16  
17  
18  
19  
20  
21  
22  
23  
24  
25  
26  
27  
28  
29  
30  
31  
32  
33  
34  
35  
36  
37  
38  
39  
40  
41  
42  
43  
44  
45  
46  
47  
48  
49  
50  
51  
52  
53  
54  
55  
56  
57  
58  
59  
60



## Discussion

Results from this study indicate that loneliness is a significant risk factor for certain types of health and social care services among the oldest old regardless of health problems. In particular, feeling slightly lonely at baseline was associated with a shorter time since last GP visiting; when modelling the association between repeated measures of loneliness and health and social care usage, feeling lonely was found to be significantly associated with increased contacts with the community nurse and use of a meals on wheels service. The results from the sensitivity analysis did not differ from the presented results substantively, generally supporting the conclusions made based on the current analysis (Supplementary Information).

The finding of loneliness and its association with GP visits is consistent with the finding from a previous UK population-based study, though there are slight differences between the two studies. In our study, compared to non-lonely individuals, we found that those who felt slightly lonely had a shorter time interval since they last visited their GP; in their study, they found that individuals who felt lonely tended to visit GPs about twice as often as individuals who were not lonely[25]. The explanations for the link between loneliness and frequent GP visits might include that GPs are the first point of call for multiple care needs, and more importantly, the GP healthcare system is intended to allow GPs to build a long-term relationship with their patients. GPs therefore may be familiar with their patients' health conditions and even emotional changes, and consequently trust can be built within this relationship. Indeed, Ellaway and colleagues explained that older people who felt lonely and did not have family members or friends around them tended to regard their GPs as their confidants[25]. Similarly, data from the 'Campaign to End Loneliness' suggest that more than 75% of GPs and one in ten hospital doctors reported seeing about 1 to 5 or 1 to 6 lonely people in a day[26]. These findings imply that numerous lonely individuals are aware of their loneliness and have self-motivations to alleviate loneliness. Seeking advice from trusted GPs may give them a sense of hope and safety. Findings also highlight the importance of emotional support (e.g. having confidants) in the experience of loneliness.

To the best of our knowledge, this is the first time the associations between loneliness and community nurse contacts and use of a meals on wheels service have been studied. Although potentially indicating that these types of service use are markers for levels of poor health and disability associated with greater loneliness, the associations remained after controlling for numbers of health conditions. The independent significance of these associations could imply that similar with GPs, community nurses or meals on wheels service providers may have a hidden role in providing social interactions. For example, in a fixed randomized control study investigating the role of home-delivered meals programme on 626 American community-dwelling seniors' feelings of loneliness, researchers reported that compared to control groups (i.e. individuals who received meal delivery once a week and individuals remained on meal delivery waiting list), those who received their meals delivery on a daily basis experienced decreases in their loneliness, and the reduction was explained as the meal-delivery services indirectly provided more opportunities to elders for social interactions[27].

This study has several strengths. The use of data from one of the longest-run prospective cohort studies of the very old allows us to measure loneliness and outcome variables at different time points; by using the repeated measurements, we can therefore examine the association between loneliness and health and social care utilisation more thoroughly. Moreover, CC75C collected data on different types of health and social care services, which enables us to investigate the impact of loneliness on health and social care utilisation in a

broader way than previous studies did. Furthermore, the use of weights can minimise the effect of non-response to the findings and reduce bias due to drop out[20].

However, caution should be taken when interpreting the findings. The use of self-reported health service and social care utilisation may introduce recall bias. However, it is unlikely to have effects on our findings as for most interviewed participants, their proxy informants were also interviewed, and answers from both were compared and the most reliable answers (i.e. if answers were different, then proxy informants' answers were selected for participants who had cognitive problems) to minimize the differences. Responses about health and social care service use were coded with maximum values, without recording the true maximum. It is possible that some participants are heavy users of services, resulting in higher service use than measured here. It is possible that this led to a loss of ability to identify relationships for heavy users of services, and no sensitivity analyses are possible to test this. However, for each type of health and social service, the largest proportion of participants who were in the maximum category was less than 6%. Therefore, results from the current study are unlikely to be influenced by the extreme values of service use. Additionally, the use of a single-item scale to assess loneliness may under-estimate the true prevalence of loneliness as participants might be concerned about social stigma, but it has been reported that single-item scales have advantages in implementation in large studies and have good reliability among older people[16]. Another consideration is that, as in previous studies[10], we included disability as one of the covariates, and it was determined by whether participants needed help from family, friends or neighbours for performing at least one of their daily activities, such as cooking or doing housework. This type of help can be regarded as informal care, therefore it is possible that participants who can obtain informal care may use fewer community services. Medication use may also serve as a confounder in this analysis, as individuals who are taking prescribed medications may need to visit their GPs more regularly. However, because of the unavailability of relevant data, we were unable to adjust for this variable. Although this might dilute the association between loneliness and health care utilisation, it was unlikely to change the direction of the association.

This finding has implications for public health and practice. As noted earlier, lonely individuals visit their GPs more frequently than non-lonely individuals. They expect emotional supports and professional advice from their GPs to alleviate feelings of loneliness. However, from GPs' point of view, they are burdened with lack of therapeutic options. This might be due to the fact that feeling lonely reflects individuals' personal experience, therefore, the trigger for loneliness varies between individuals. Moreover, the coping skills differ from individuals. In addition, GPs need to deal with time issues, e.g. lack of time. Taken together, the limited options to support people affected with loneliness and lack of time make it difficult for GPs to help with lonely patients[28]. This raises an urgent need for developing professional service that specifically target on loneliness, so that GPs can refer their lonely patients to appropriate help. Indeed, in a recent programme 'The town with a plan to end loneliness' aired by the BBC, a programme presenter pointed out that the medical centre not only is responsible for giving medical advice, but also should listen to patients' non-medical needs and connect them to people who can help[29].

In addition, the finding that loneliness was associated with increased use of community services, such as frequent nurse contacts and meals on wheels service usage, has implications on public policy. This implication may be more pronounced for public officials in developing countries. For example, China is also facing quickened population ageing. However, the traditional social welfare system cannot meet the care needs resulting from the rapidly

1  
2  
3 increased number of older people. The government has just recognized the importance of  
4 community services and is prioritising fostering the development of community services[30].  
5 Interestingly, in spite of the differences in social and cultural contexts, the specific services  
6 that the Chinese government focuses on are day care, dining rooms or other centralized meal  
7 delivery services, echoing the community services in western countries[31]. Although the  
8 public official has been long aware that chronic diseases, such as physical and cognitive  
9 impairments, are strong predictors for community care services, loneliness as a risk factor has  
10 been neglected. Findings from the current study add new evidence, that is, loneliness also  
11 contributes to the great needs for community care services to public. Despite the strong  
12 associations between loneliness and increased use of GP and community-based services, it is  
13 possible that lonely individuals have less knowledge about appropriate access to health and  
14 social care services or do not have the means to access them than non-lonely individuals.  
15 Given the robust link between loneliness and health outcomes reported in previous studies,  
16 individuals who are lonely may be at higher risk of health decline, and consequently are  
17 likely to have greater need of health services. However, in the current analysis, health  
18 conditions were adjusted for, implying that there might be other mechanisms underlying the  
19 association between loneliness and health and social care services usage. This again  
20 emphasises the importance of developing services that are sensitive to loneliness.  
21  
22  
23  
24

25 In conclusion, loneliness was found to be associated with frequent GP visits, community  
26 nurse contacts and meals on wheels service usage, independently of participants' health  
27 problems. As population ageing is happening across the world, it is urgent to realize the  
28 significance of loneliness on health service and social care demands. Moreover, evidence on  
29 interventions to prevent and reduce loneliness do not show promising results[32]. Future  
30 research is required to examine risk factors for loneliness in order to develop effective  
31 interventions that target on loneliness alleviation.  
32  
33  
34  
35  
36  
37  
38  
39  
40  
41  
42  
43  
44  
45  
46  
47  
48  
49  
50  
51  
52  
53  
54  
55  
56  
57  
58  
59  
60

## References

1. Dykstra PA. Older adult loneliness: myths and realities. *European journal of ageing* 2009;6(2):91.
2. Nolen-Hoeksema S, Ahrens C. Age differences and similarities in the correlates of depressive symptoms. *Psychology and aging*. 2002 Mar;17(1):116.
3. O'lunaigh C, O'connell H, Chin A-V, et al. Loneliness and cognition in older people: the Dublin Healthy Ageing study. *Aging & mental health* 2012;16(3):347-52.
4. Wilson RS, Krueger KR, Arnold SE, et al. Loneliness and risk of Alzheimer disease. *Archives of general psychiatry* 2007;64(2):234-40.
5. Hawkley LC, Thisted RA, Masi CM, et al. Loneliness predicts increased blood pressure: 5-year cross-lagged analyses in middle-aged and older adults. *Psychology and aging* 2010;25(1):132.
6. Keysor JJ. Does late-life physical activity or exercise prevent or minimize disablement?: a critical review of the scientific evidence. *American journal of preventive medicine*. 2003 Oct 1;25(3):129-36.
7. Luo Y, Hawkley LC, Waite LJ, Cacioppo JT. Loneliness, health, and mortality in old age: a national longitudinal study. *Social science & medicine*. 2012 Mar 31;74(6):907-14.
8. Kurina LM, Knutson KL, Hawkley LC, et al. Loneliness is associated with sleep fragmentation in a communal society. *Sleep* 2011;34(11):1519-26.
9. Holt-Lunstad J, Smith TB, Baker M, et al. Loneliness and social isolation as risk factors for mortality: a meta-analytic review. *Perspectives on Psychological Science* 2015;10(2):227-37.
10. Gerst-Emerson K, Jayawardhana J. Loneliness as a Public Health Issue: The Impact of Loneliness on Health Care Utilization Among Older Adults. *American Journal of Public Health* 2015;105(5):1013-19. doi: 10.2105/AJPH.2014.302427
11. Newall N, McArthur J, Menec VH. A longitudinal examination of social participation, loneliness, and use of physician and hospital services. *Journal of aging and health* 2015;27(3):500-18.
12. Wenger GC, Burholt V. Changes in levels of social isolation and loneliness among older people in a rural area: A twenty-year longitudinal study. *Canadian Journal on Aging/la revue canadienne du vieillissement* 2004;23(2):115-27.
13. Victor CR, Bowling A. A longitudinal analysis of loneliness among older people in Great Britain. *The Journal of psychology* 2012;146(3):313-31.
14. Brittain K, Kingston A, Davies K, et al. An investigation into the patterns of loneliness and loss in the oldest old-Newcastle 85+ study. *Ageing & Society* 2017;37(1):39-62.
15. Fleming J, Zhao E, O'connor DW, et al. Cohort profile: the Cambridge City over-75s Cohort (CC75C). *International journal of epidemiology* 2007;36(1):40-46.
16. Victor C, Grenade L, Boldy D. Measuring loneliness in later life: a comparison of differing measures. *Reviews in Clinical Gerontology* 2005;15(1):63-70.
17. Roth M, Tym E, Mountjoy C, et al. CAMDEX. A standardised instrument for the diagnosis of mental disorder in the elderly with special reference to the early detection of dementia. *The British journal of psychiatry* 1986;149(6):698-709.
18. Lawton MP, Brody EM. Assessment of older people: self-maintaining and instrumental activities of daily living. *The gerontologist* 1969;9(3\_Part\_1):179-86.
19. Kurland BF, Heagerty PJ. Directly parameterized regression conditioning on being alive: analysis of longitudinal data truncated by deaths. *Biostatistics* 2005;6(2):241-58.
20. Jones M, Mishra GD, Dobson A. Analytical results in longitudinal studies depended on target of inference and assumed mechanism of attrition. *J Clin Epidemiol*

- 2015;68(10):1165-75. doi: 10.1016/j.jclinepi.2015.03.011 [published Online First: 2015/04/30]
21. Karazsia BT, Van Dulmen MH. Regression models for count data: Illustrations using longitudinal predictors of childhood injury. *Journal of pediatric psychology* 2008;33(10):1076-84.
  22. Robins JM, Rotnitzky A, Zhao LP. Analysis of semiparametric regression models for repeated outcomes in the presence of missing data. *Journal of the american statistical association* 1995;90(429):106-21.
  23. Dufouil C, Brayne C, Clayton D. Analysis of longitudinal studies with death and drop-out: a case study. *Statistics in medicine* 2004;23(14):2215-26.
  24. Kurland BF, Johnson LL, Egleston BL, et al. Longitudinal Data with Follow-up Truncated by Death: Match the Analysis Method to Research Aims. *Statistical science : a review journal of the Institute of Mathematical Statistics* 2009;24(2):211. doi: 10.1214/09-STS293
  25. Ellaway A, Wood S, Macintyre S. Someone to talk to? The role of loneliness as a factor in the frequency of GP consultations. *Br J Gen Pract* 1999;49(442):363-67.
  26. Cooper C. The Campaign to End Loneliness Surveyed more than 1,000 family doctors. *Independent* 2013 Nov; <https://www.independent.co.uk/life-style/health-and-families/health-news/charity-claims-loneliness-is-the-reason-one-in-10-visit-their-gp-8940392.html> (accessed 5 May 2018).
  27. Thomas KS, Akobundu U, Dosa D. More than a meal? A randomized control trial comparing the effects of home-delivered meals programs on participants' feelings of loneliness. *Journals of Gerontology Series B: Psychological Sciences and Social Sciences* 2015;71(6):1049-58.
  28. van der Zwet J, Koelewijn-van Loon MS, van den Akker M. Lonely patients in general practice: a call for revealing GPs' emotions? A qualitative study. *Family Practice* 2009;26(6):501-09. doi: 10.1093/fampra/cmp059
  29. BBC World Hacks. The town with a plan to end loneliness.2018.
  30. Zhou J, Walker A. The need for community care among older people in China. *Ageing & Society* 2016;36(6):1312-32.
  31. Tian, Q. Community care for the elderly: comparative study based on welfare pluralism. Doctoral dissertation, 2010.
  32. Cattan M, White M, Bond J, et al. Preventing social isolation and loneliness among older people: a systematic review of health promotion interventions. *Ageing & Society* 2005;25(1):41-67.

**Acknowledgements:** The authors gratefully acknowledge the contribution of previous investigators, past research team members, and staff in collaborating general practices and care homes, as well as the study respondents, their families and friends without whose help none of this research would be possible.

**Contributors:** HW proposed the research idea and conducted the analysis, as well as drafted the manuscript. CB critically reviewed the draft of this manuscript and provided input into analysis. EZ, JF, TD and K-TK provided feedback. JF and TD edited versions of the manuscript. All authors agreed to the submitted version of the paper.

**Funding:** The first author researcher received no specific grant from any funding agency in the public, commercial or not-for-profit sectors. We thank all the past CC75C sponsors for financial support spanning the decades since the Medical Research Council enabled the first follow-up survey (see study website for full list of project grants:

1  
2  
3 <http://www.cc75c.group.cam.ac.uk/background/grants/>), most recently the Abbeyfield  
4 Research Foundation and the BMA Foundation for Medical Research Dawkins and Strutt  
5 Grant. CC75C was a member study of the National Institute for Health Research funded  
6 Collaboration for Leadership in Applied Health Research & Care (CLAHRC) for  
7 Cambridgeshire and Peterborough. No funder sponsor played any role in the study design; in  
8 the collection, analysis, and interpretation of data; or in the writing of the report and the  
9 decision to submit the article for publication. All researchers were independent from funders.  
10  
11

12 **Competing interests:** None declared.  
13

14 **Patient consent:** Obtained.  
15

16  
17 **Ethics approval:** The study is approved by the East of England - Cambridge Central  
18 Research Ethics Committee, approval number 05/ Q0108/308.  
19

20 **Data sharing statement:** No additional data available.  
21

22  
23 Figure 1. Overview of participation for current analysis  
24

25 Figure 2. Overview of statistical models  
26  
27  
28  
29  
30  
31  
32  
33  
34  
35  
36  
37  
38  
39  
40  
41  
42  
43  
44  
45  
46  
47  
48  
49  
50  
51  
52  
53  
54  
55  
56  
57  
58  
59  
60

1  
2  
3  
4  
5  
6  
7  
8  
9  
10  
11  
12  
13  
14  
15  
16  
17  
18  
19  
20  
21  
22  
23  
24  
25  
26  
27  
28  
29  
30  
31  
32  
33  
34  
35  
36  
37  
38  
39  
40  
41  
42  
43  
44  
45  
46  
47  
48  
49  
50  
51  
52  
53  
54  
55  
56  
57  
58  
59  
60



Figure 1. Overview of participation for current analysis

Figure 1 Overview of participation

209x297mm (300 x 300 DPI)

1  
2  
3  
4  
5  
6  
7  
8  
9  
10  
11  
12  
13  
14  
15  
16  
17  
18  
19  
20  
21  
22  
23  
24  
25  
26  
27  
28  
29  
30  
31  
32  
33  
34  
35  
36  
37  
38  
39  
40  
41  
42  
43  
44  
45  
46  
47  
48  
49  
50  
51  
52  
53  
54  
55  
56  
57  
58  
59  
60

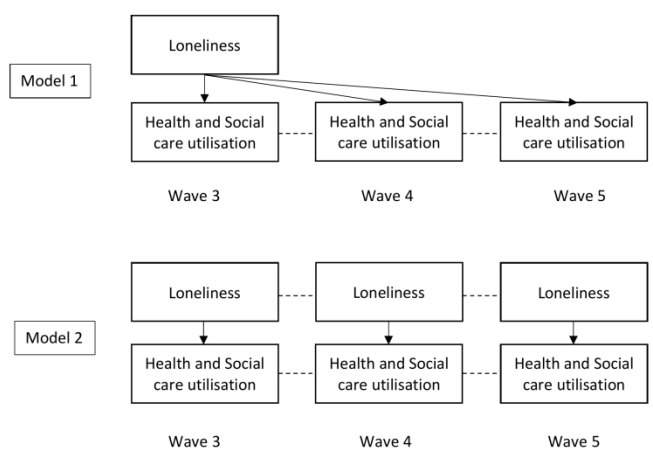

Figure 2. Overview of statistical models

Figure 2 Overview of statistical models

209x297mm (300 x 300 DPI)



## Supplementary Information

S1. Multivariable analyses of baseline loneliness and health and social care utilisation after excluding physical impairments and number of chronic diseases

|                             | Home Help<br>IRR (95% CI) | Community Nurse<br>IRR (95% CI) | Meals on Wheels<br>IRR (95% CI) | Day centre<br>IRR (95% CI) | Hospital visits<br>IRR (95% CI) | Time since last saw a GP<br>Beta (95% CI) |
|-----------------------------|---------------------------|---------------------------------|---------------------------------|----------------------------|---------------------------------|-------------------------------------------|
| Time                        | 1.2 (0.5-2.8)             | 3.5 (1.2-9.9)                   | 1.1 (0.4-2.8)                   | 0.8 (0.2-2.8)              | 1.5 (0.8-2.9)                   | 0.1 (-0.2, 0.6)                           |
| <b>Loneliness (wave 3)</b>  |                           |                                 |                                 |                            |                                 |                                           |
| Slightly lonely             | 1.4 (0.5-4.1)             | 0.5 (0.1-1.9)                   | 2.1 (0.9-4.7)                   | 2.3 (0.6-8.5)              | 1.4 (0.9-2.3)                   | <b>-0.6 (-0.9, -0.3)</b>                  |
| Lonely                      | <b>2.9 (1.1-7.7)</b>      | 1.0 (0.4-2.4)                   | 2.3 (0.9-5.4)                   | 2.0 (0.6-6.3)              | 1.4 (0.9-2.4)                   | -0.1 (-0.4, 0.3)                          |
| <b>Age</b>                  |                           |                                 |                                 |                            |                                 |                                           |
| 85-89                       | 0.5 (0.2-1.2)             | 0.8 (0.4-1.8)                   | 1.0 (0.5-2.1)                   | 1.1 (0.5-2.4)              | 0.8 (0.5-1.2)                   | 0.2 (-0.1, 0.5)                           |
| 90+                         | 1.1 (0.3-4.3)             | 0.8 (0.3-2.2)                   | 0.5 (0.1-3.4)                   | 1.9 (0.3-12.9)             | 1.3 (0.6-3.0)                   | 0.1 (-0.6, 0.8)                           |
| <b>Sex</b>                  |                           |                                 |                                 |                            |                                 |                                           |
| Women                       | 1.4 (0.5-3.6)             | 0.9 (0.3-2.7)                   | 0.7 (0.3-1.4)                   | 1.2 (0.4-3.5)              | 0.7 (0.4-1.04)                  | -0.4 (-0.8, -0.1)                         |
| <b>Depression</b>           |                           |                                 |                                 |                            |                                 |                                           |
| Yes                         | 0.9 (0.3-2.7)             | 0.8 (0.2-2.8)                   | 0.8 (0.3-2.2)                   | 0.5 (0.1-1.7)              | 1.4 (0.8-2.5)                   | -0.6 (-1.0, -0.2)                         |
| <b>Physical functioning</b> |                           |                                 |                                 |                            |                                 |                                           |
| IADL disability only        | 3.3 (1.3-8.6)             | 1.2 (0.4-3.9)                   | 1.0 (0.4-2.5)                   | 3.2 (1.2-8.5)              | 0.8 (0.4-1.4)                   | -0.4 (-0.8, 0.01)                         |
| IADL & ADL disabilities     | 4.1 (1.6-10.3)            | 3.1 (1.2-8.1)                   | 1.7 (0.8-3.6)                   | 4.1 (1.6-11.0)             | 1.3 (0.8-2.1)                   | -0.1 (-0.4, 0.2)                          |
| <b>Cognition</b>            | 1.0 (0.9-1.1)             | 1.0 (0.9-1.1)                   | 0.9 (0.8-1.02)                  | 1.0 (0.9-1.1)              | 1.0 (0.9-1.1)                   | -0.05 (-0.1, 0.01)                        |

Reference groups: not lonely, 80-84 years old, men, not depressed, and not disabled.

IRR: incidence rate ratio.

S2. Multivariable analyses of time-varying loneliness and health and social care utilisation after excluding physical impairments and number of chronic diseases

|                             | <b>Home Help</b>      | <b>Community Nurse</b> | <b>Meals on Wheels</b> | <b>Day centre</b> | <b>Hospital visits</b> | <b>Time since last saw a GP</b> |
|-----------------------------|-----------------------|------------------------|------------------------|-------------------|------------------------|---------------------------------|
|                             | IRR (95% CI)          | IRR (95% CI)           | IRR (95% CI)           | IRR (95% CI)      | IRR (95% CI)           | Beta (95% CI)                   |
| Time                        | 1.0 (0.4, 2.5)        | 3.1 (1.2, 7.9)         | 1.0 (0.4, 2.6)         | 1.3 (0.3, 6.4)    | 1.4 (0.8, 2.6)         | 0.1 (-0.3, 0.5)                 |
| <b>Loneliness</b>           |                       |                        |                        |                   |                        |                                 |
| Slightly lonely             | 1.3 (0.6, 2.8)        | 0.8 (0.3, 2.2)         | 1.8 (0.8, 4.0)         | 2.1 (0.7, 7.0)    | 1.5 (1.0, 2.3)         | -0.3 (-0.7, 0.1)                |
| Lonely                      | <b>2.5 (1.1, 5.6)</b> | <b>3.2 (1.4, 7.2)</b>  | <b>3.1 (1.3, 7.1)</b>  | 1.8 (0.5, 6.3)    | <b>1.6 (1.0, 2.6)</b>  | -0.1 (-0.5, 0.2)                |
| <b>Age</b>                  |                       |                        |                        |                   |                        |                                 |
| 85-89                       | 0.5 (0.2, 1.2)        | 0.7 (0.3, 1.8)         | 1.1 (0.5, 2.3)         | 1.1 (0.4, 2.9)    | 0.8 (0.5, 1.2)         | 0.1 (-0.2, 0.4)                 |
| 90+                         | 1.1 (0.3, 5.0)        | 1.0 (0.4, 3.0)         | 0.7 (0.1, 6.6)         | 3.3 (0.5, 20.0)   | 1.0 (0.4, 2.8)         | 0.1 (-0.6, 0.8)                 |
| <b>Sex</b>                  |                       |                        |                        |                   |                        |                                 |
| Women                       | 1.4 (0.6, 3.3)        | 0.7 (0.2, 2.0)         | 0.7 (0.3, 1.6)         | 1.3 (0.4, 4.3)    | 0.7 (0.4, 1.0)         | -0.5 (-0.8, -0.1)               |
| <b>Depression</b>           |                       |                        |                        |                   |                        |                                 |
| Yes                         | 0.9 (0.3, 2.6)        | 0.6 (0.2, 2.2)         | 0.8 (0.3, 2.4)         | 0.6 (0.1, 2.3)    | 1.4 (0.8, 2.5)         | -0.6 (-1.0, -0.2)               |
| <b>Physical functioning</b> |                       |                        |                        |                   |                        |                                 |
| IADL disability only        | 2.8 (1.1, 7.2)        | 1.1 (0.4, 3.3)         | 0.9 (0.3, 2.4)         | 3.9 (1.4, 11.0)   | 0.8 (0.5, 1.5)         | -0.4 (-0.9, -0.03)              |
| IADL & ADL disabilities     | 3.9 (1.5, 10.1)       | 1.9 (0.7, 4.8)         | 1.6 (0.7, 3.8)         | 3.7 (1.1, 11.7)   | 1.3 (0.8, 2.1)         | 0.03 (-0.3, 0.4)                |
| <b>Cognition</b>            | 1.0 (0.9, 1.1)        | 0.9 (0.8, 1.0)         | 0.9 (0.8, 1.1)         | 1.0 (0.9, 1.1)    | 1.0 (0.9, 1.1)         | -0.05 (-0.1, 0.01)              |

Reference groups: not lonely, 80-84 years old, men, not depressed, and not disabled.

IRR: incidence rate ratio.

## STROBE statement checklist

This manuscript was reported according to STROBE statement checklist. The corresponding answer to each item was labelled in Yellow. The answer indicated the page number in the main document against each criterion.

|                           | Item No | Recommendation                                                                                                                                                                                                                                                                                                                                                                                                                                                                                                                                                                                                                                                                                   |
|---------------------------|---------|--------------------------------------------------------------------------------------------------------------------------------------------------------------------------------------------------------------------------------------------------------------------------------------------------------------------------------------------------------------------------------------------------------------------------------------------------------------------------------------------------------------------------------------------------------------------------------------------------------------------------------------------------------------------------------------------------|
| <b>Title and abstract</b> | 1       | (a) Indicate the study's design with a commonly used term in the title or the abstract                                                                                                                                                                                                                                                                                                                                                                                                                                                                                                                                                                                                           |
| <b>P. 1-2</b>             |         | (b) Provide in the abstract an informative and balanced summary of what was done and what was found                                                                                                                                                                                                                                                                                                                                                                                                                                                                                                                                                                                              |
| <b>Introduction P. 3</b>  |         |                                                                                                                                                                                                                                                                                                                                                                                                                                                                                                                                                                                                                                                                                                  |
| Background/rationale      | 2       | Explain the scientific background and rationale for the investigation being reported                                                                                                                                                                                                                                                                                                                                                                                                                                                                                                                                                                                                             |
| Objectives                | 3       | State specific objectives, including any prespecified hypotheses                                                                                                                                                                                                                                                                                                                                                                                                                                                                                                                                                                                                                                 |
| <b>Methods P. 3-6</b>     |         |                                                                                                                                                                                                                                                                                                                                                                                                                                                                                                                                                                                                                                                                                                  |
| Study design              | 4       | Present key elements of study design early in the paper                                                                                                                                                                                                                                                                                                                                                                                                                                                                                                                                                                                                                                          |
| Setting                   | 5       | Describe the setting, locations, and relevant dates, including periods of recruitment, exposure, follow-up, and data collection                                                                                                                                                                                                                                                                                                                                                                                                                                                                                                                                                                  |
| Participants              | 6       | (a) <i>Cohort study</i> —Give the eligibility criteria, and the sources and methods of selection of participants. Describe methods of follow-up<br><i>Case-control study</i> —Give the eligibility criteria, and the sources and methods of case ascertainment and control selection. Give the rationale for the choice of cases and controls<br><i>Cross-sectional study</i> —Give the eligibility criteria, and the sources and methods of selection of participants<br>(b) <i>Cohort study</i> —For matched studies, give matching criteria and number of exposed and unexposed<br><i>Case-control study</i> —For matched studies, give matching criteria and the number of controls per case |
| Variables                 | 7       | Clearly define all outcomes, exposures, predictors, potential confounders, and effect modifiers. Give diagnostic criteria, if applicable                                                                                                                                                                                                                                                                                                                                                                                                                                                                                                                                                         |
| Data sources/ measurement | 8*      | For each variable of interest, give sources of data and details of methods of assessment (measurement). Describe comparability of assessment methods if there is more than one group                                                                                                                                                                                                                                                                                                                                                                                                                                                                                                             |
| Bias                      | 9       | Describe any efforts to address potential sources of bias                                                                                                                                                                                                                                                                                                                                                                                                                                                                                                                                                                                                                                        |
| Study size                | 10      | Explain how the study size was arrived at                                                                                                                                                                                                                                                                                                                                                                                                                                                                                                                                                                                                                                                        |
| Quantitative variables    | 11      | Explain how quantitative variables were handled in the analyses. If applicable, describe which groupings were chosen and why                                                                                                                                                                                                                                                                                                                                                                                                                                                                                                                                                                     |
| Statistical methods       | 12      | (a) Describe all statistical methods, including those used to control for confounding<br>(b) Describe any methods used to examine subgroups and interactions<br>(c) Explain how missing data were addressed<br>(d) <i>Cohort study</i> —If applicable, explain how loss to follow-up was addressed<br><i>Case-control study</i> —If applicable, explain how matching of cases and controls was addressed<br><i>Cross-sectional study</i> —If applicable, describe analytical methods taking account of sampling strategy<br>(e) Describe any sensitivity analyses                                                                                                                                |

Continued on next page

1  
2  
3  
4  
5  
6  
7  
8  
9  
10  
11  
12  
13  
14  
15  
16  
17  
18  
19  
20  
21  
22  
23  
24  
25  
26  
27  
28  
29  
30  
31  
32  
33  
34  
35  
36  
37  
38  
39  
40  
41  
42  
43  
44  
45  
46  
47  
48  
49  
50  
51  
52  
53  
54  
55  
56  
57  
58  
59  
60

| <b>Results</b>                           |     |                                                                                                                                                                                                                                                                                                                                                                                                               |
|------------------------------------------|-----|---------------------------------------------------------------------------------------------------------------------------------------------------------------------------------------------------------------------------------------------------------------------------------------------------------------------------------------------------------------------------------------------------------------|
| Participants                             | 13* | (a) Report numbers of individuals at each stage of study—eg numbers potentially eligible, examined for eligibility, confirmed eligible, included in the study, completing follow-up, and analysed<br>(b) Give reasons for non-participation at each stage<br>(c) Consider use of a flow diagram                                                                                                               |
| <b>P. 6</b>                              |     |                                                                                                                                                                                                                                                                                                                                                                                                               |
| Descriptive data                         | 14* | (a) Give characteristics of study participants (eg demographic, clinical, social) and information on exposures and potential confounders<br>(b) Indicate number of participants with missing data for each variable of interest<br>(c) <i>Cohort study</i> —Summarise follow-up time (eg, average and total amount)                                                                                           |
| <b>P. 6-8</b>                            |     |                                                                                                                                                                                                                                                                                                                                                                                                               |
| Outcome data                             | 15* | <i>Cohort study</i> —Report numbers of outcome events or summary measures over time<br><i>Case-control study</i> —Report numbers in each exposure category, or summary measures of exposure<br><i>Cross-sectional study</i> —Report numbers of outcome events or summary measures                                                                                                                             |
| <b>P. 8-9</b>                            |     |                                                                                                                                                                                                                                                                                                                                                                                                               |
| Main results                             | 16  | (a) Give unadjusted estimates and, if applicable, confounder-adjusted estimates and their precision (eg, 95% confidence interval). Make clear which confounders were adjusted for and why they were included<br>(b) Report category boundaries when continuous variables were categorized<br>(c) If relevant, consider translating estimates of relative risk into absolute risk for a meaningful time period |
| <b>P. 6-11</b>                           |     |                                                                                                                                                                                                                                                                                                                                                                                                               |
| Other analyses                           | 17  | Report other analyses done—eg analyses of subgroups and interactions, and sensitivity analyses                                                                                                                                                                                                                                                                                                                |
| <b>Discussion</b> <b>P. 12-14</b>        |     |                                                                                                                                                                                                                                                                                                                                                                                                               |
| Key results                              | 18  | Summarise key results with reference to study objectives                                                                                                                                                                                                                                                                                                                                                      |
| Limitations                              | 19  | Discuss limitations of the study, taking into account sources of potential bias or imprecision. Discuss both direction and magnitude of any potential bias                                                                                                                                                                                                                                                    |
| Interpretation                           | 20  | Give a cautious overall interpretation of results considering objectives, limitations, multiplicity of analyses, results from similar studies, and other relevant evidence                                                                                                                                                                                                                                    |
| Generalisability                         | 21  | Discuss the generalisability (external validity) of the study results                                                                                                                                                                                                                                                                                                                                         |
| <b>Other information</b> <b>P. 16-17</b> |     |                                                                                                                                                                                                                                                                                                                                                                                                               |
| Funding                                  | 22  | Give the source of funding and the role of the funders for the present study and, if applicable, for the original study on which the present article is based                                                                                                                                                                                                                                                 |
