# Supplementary material for: Is loneliness associated with increased health and social care utilisation in the oldest old? Findings from a population-based longitudinal study
Source: PubMed Central journal article supplement — BMJ Open. 2019 Jun 1;9(5):e024645. doi: 10.1136/bmjopen-2018-024645 (PMC6549652; doi:10.1136/bmjopen-2018-024645), 2019-06-01
Supplement: bmjopen-2018-024645supp001.pdf [file bmjopen-2018-024645supp001.pdf]

## Supplementary Information

S1. Multivariable analyses of baseline loneliness and health and social care utilisation after excluding physical impairments and number of chronic diseases

|                             | <b>Home Help</b><br>IRR (95% CI) | <b>Community Nurse</b><br>IRR (95% CI) | <b>Meals on Wheels</b><br>IRR (95% CI) | <b>Day centre</b><br>IRR (95% CI) | <b>Hospital visits</b><br>IRR (95% CI) | <b>Time since last saw a GP</b><br>Beta (95% CI) |
|-----------------------------|----------------------------------|----------------------------------------|----------------------------------------|-----------------------------------|----------------------------------------|--------------------------------------------------|
| Time                        | 1.2 (0.5-2.8)                    | 3.5 (1.2-9.9)                          | 1.1 (0.4-2.8)                          | 0.8 (0.2-2.8)                     | 1.5 (0.8-2.9)                          | 0.1 (-0.2, 0.6)                                  |
| <b>Loneliness (wave 3)</b>  |                                  |                                        |                                        |                                   |                                        |                                                  |
| Slightly lonely             | 1.4 (0.5-4.1)                    | 0.5 (0.1-1.9)                          | 2.1 (0.9-4.7)                          | 2.3 (0.6-8.5)                     | 1.4 (0.9-2.3)                          | <b>-0.6 (-0.9, -0.3)</b>                         |
| Lonely                      | <b>2.9 (1.1-7.7)</b>             | 1.0 (0.4-2.4)                          | 2.3 (0.9-5.4)                          | 2.0 (0.6-6.3)                     | 1.4 (0.9-2.4)                          | -0.1 (-0.4, 0.3)                                 |
| <b>Age</b>                  |                                  |                                        |                                        |                                   |                                        |                                                  |
| 85-89                       | 0.5 (0.2-1.2)                    | 0.8 (0.4-1.8)                          | 1.0 (0.5-2.1)                          | 1.1 (0.5-2.4)                     | 0.8 (0.5-1.2)                          | 0.2 (-0.1, 0.5)                                  |
| 90+                         | 1.1 (0.3-4.3)                    | 0.8 (0.3-2.2)                          | 0.5 (0.1-3.4)                          | 1.9 (0.3-12.9)                    | 1.3 (0.6-3.0)                          | 0.1 (-0.6, 0.8)                                  |
| <b>Sex</b>                  |                                  |                                        |                                        |                                   |                                        |                                                  |
| Women                       | 1.4 (0.5-3.6)                    | 0.9 (0.3-2.7)                          | 0.7 (0.3-1.4)                          | 1.2 (0.4-3.5)                     | 0.7 (0.4-1.04)                         | -0.4 (-0.8, -0.1)                                |
| <b>Depression</b>           |                                  |                                        |                                        |                                   |                                        |                                                  |
| Yes                         | 0.9 (0.3-2.7)                    | 0.8 (0.2-2.8)                          | 0.8 (0.3-2.2)                          | 0.5 (0.1-1.7)                     | 1.4 (0.8-2.5)                          | -0.6 (-1.0, -0.2)                                |
| <b>Physical functioning</b> |                                  |                                        |                                        |                                   |                                        |                                                  |
| IADL disability only        | 3.3 (1.3-8.6)                    | 1.2 (0.4-3.9)                          | 1.0 (0.4-2.5)                          | 3.2 (1.2-8.5)                     | 0.8 (0.4-1.4)                          | -0.4 (-0.8, 0.01)                                |
| IADL & ADL disabilities     | 4.1 (1.6-10.3)                   | 3.1 (1.2-8.1)                          | 1.7 (0.8-3.6)                          | 4.1 (1.6-11.0)                    | 1.3 (0.8-2.1)                          | -0.1 (-0.4, 0.2)                                 |
| <b>Cognition</b>            |                                  |                                        |                                        |                                   |                                        |                                                  |
|                             | 1.0 (0.9-1.1)                    | 1.0 (0.9-1.1)                          | 0.9 (0.8-1.02)                         | 1.0 (0.9-1.1)                     | 1.0 (0.9-1.1)                          | -0.05 (-0.1, 0.01)                               |

Reference groups: not lonely, 80-84 years old, men, not depressed, and not disabled.  
IRR: incidence rate ratio.

S2. Multivariable analyses of time-varying loneliness and health and social care utilisation after excluding physical impairments and number of chronic diseases

|                             | <b>Home Help</b>      | <b>Community Nurse</b> | <b>Meals on Wheels</b> | <b>Day centre</b> | <b>Hospital visits</b> | <b>Time since last saw a GP</b> |
|-----------------------------|-----------------------|------------------------|------------------------|-------------------|------------------------|---------------------------------|
|                             | IRR (95% CI)          | IRR (95% CI)           | IRR (95% CI)           | IRR (95% CI)      | IRR (95% CI)           | Beta (95% CI)                   |
| Time                        | 1.0 (0.4, 2.5)        | 3.1 (1.2, 7.9)         | 1.0 (0.4, 2.6)         | 1.3 (0.3, 6.4)    | 1.4 (0.8, 2.6)         | 0.1 (-0.3, 0.5)                 |
| <b>Loneliness</b>           |                       |                        |                        |                   |                        |                                 |
| Slightly lonely             | 1.3 (0.6, 2.8)        | 0.8 (0.3, 2.2)         | 1.8 (0.8, 4.0)         | 2.1 (0.7, 7.0)    | 1.5 (1.0, 2.3)         | -0.3 (-0.7, 0.1)                |
| Lonely                      | <b>2.5 (1.1, 5.6)</b> | <b>3.2 (1.4, 7.2)</b>  | <b>3.1 (1.3, 7.1)</b>  | 1.8 (0.5, 6.3)    | <b>1.6 (1.0, 2.6)</b>  | -0.1 (-0.5, 0.2)                |
| <b>Age</b>                  |                       |                        |                        |                   |                        |                                 |
| 85-89                       | 0.5 (0.2, 1.2)        | 0.7 (0.3, 1.8)         | 1.1 (0.5, 2.3)         | 1.1 (0.4, 2.9)    | 0.8 (0.5, 1.2)         | 0.1 (-0.2, 0.4)                 |
| 90+                         | 1.1 (0.3, 5.0)        | 1.0 (0.4, 3.0)         | 0.7 (0.1, 6.6)         | 3.3 (0.5, 20.0)   | 1.0 (0.4, 2.8)         | 0.1 (-0.6, 0.8)                 |
| <b>Sex</b>                  |                       |                        |                        |                   |                        |                                 |
| Women                       | 1.4 (0.6, 3.3)        | 0.7 (0.2, 2.0)         | 0.7 (0.3, 1.6)         | 1.3 (0.4, 4.3)    | 0.7 (0.4, 1.0)         | -0.5 (-0.8, -0.1)               |
| <b>Depression</b>           |                       |                        |                        |                   |                        |                                 |
| Yes                         | 0.9 (0.3, 2.6)        | 0.6 (0.2, 2.2)         | 0.8 (0.3, 2.4)         | 0.6 (0.1, 2.3)    | 1.4 (0.8, 2.5)         | -0.6 (-1.0, -0.2)               |
| <b>Physical functioning</b> |                       |                        |                        |                   |                        |                                 |
| IADL disability only        | 2.8 (1.1, 7.2)        | 1.1 (0.4, 3.3)         | 0.9 (0.3, 2.4)         | 3.9 (1.4, 11.0)   | 0.8 (0.5, 1.5)         | -0.4 (-0.9, -0.03)              |
| IADL & ADL disabilities     | 3.9 (1.5, 10.1)       | 1.9 (0.7, 4.8)         | 1.6 (0.7, 3.8)         | 3.7 (1.1, 11.7)   | 1.3 (0.8, 2.1)         | 0.03 (-0.3, 0.4)                |
| <b>Cognition</b>            | 1.0 (0.9, 1.1)        | 0.9 (0.8, 1.0)         | 0.9 (0.8, 1.1)         | 1.0 (0.9, 1.1)    | 1.0 (0.9, 1.1)         | -0.05 (-0.1, 0.01)              |

Reference groups: not lonely, 80-84 years old, men, not depressed, and not disabled.

IRR: incidence rate ratio.
